# Supplementary material for: Antioxidant Capacity, Anticancer Ability and Flavonoids Composition of 35 Citrus (Citrus reticulata Blanco) Varieties
Source: PubMed Central journal article supplement (PMC6152254; doi:10.3390/molecules22071114), 2017-07-05
Supplement: molecules-22-01114-s001.pdf [file molecules-22-01114-s001.pdf]

Supplementary Materials: Figure S1–S5, Table S1–S10.

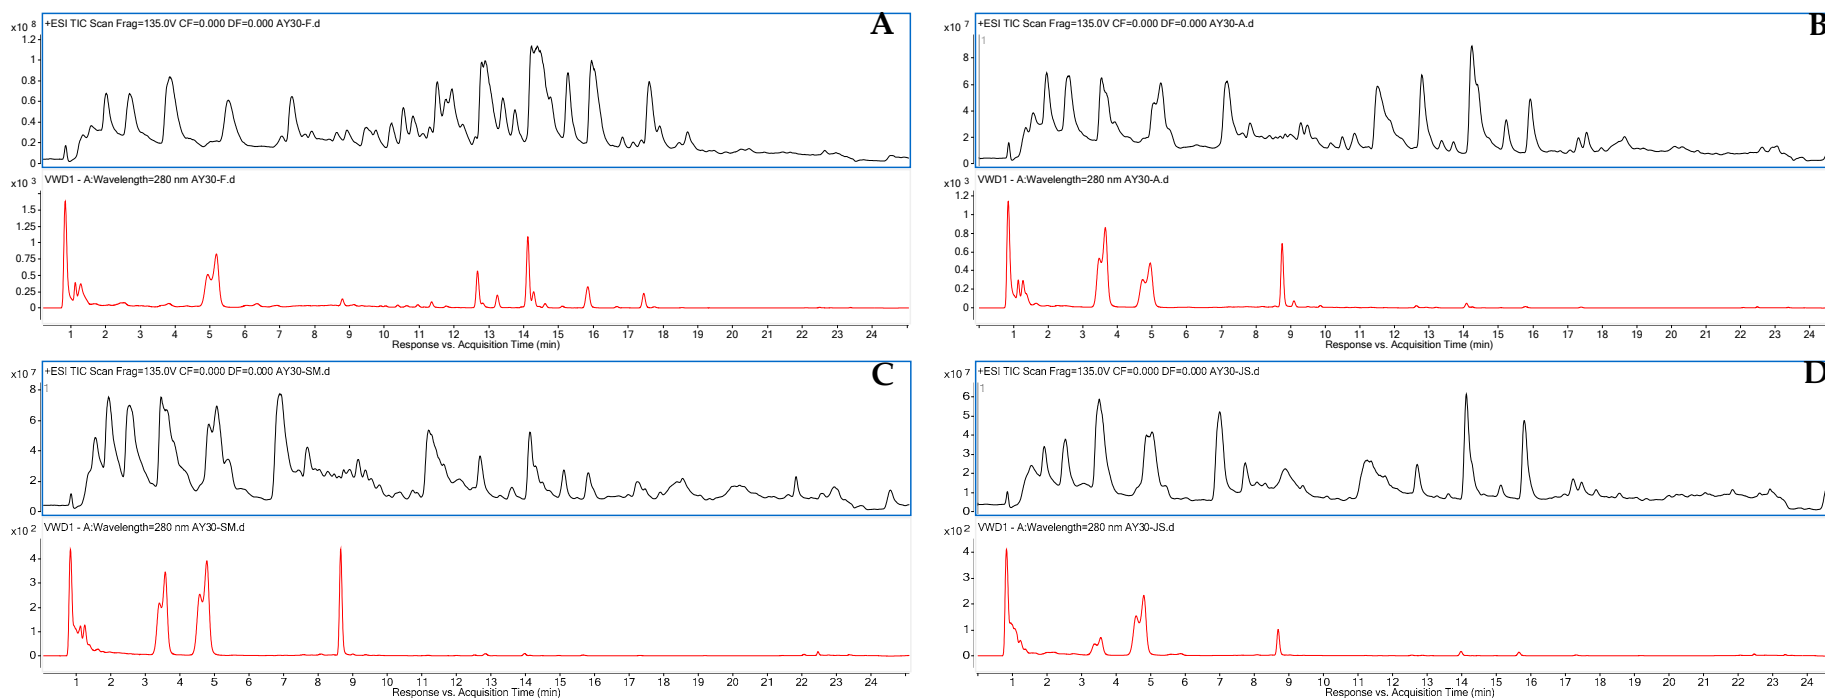

Figure S1. Typical UPLC chromatogram and mass spectrum of flavedo (A), albedo (B), segment membrane (C) and juice sacs (D) part of AY30.

10

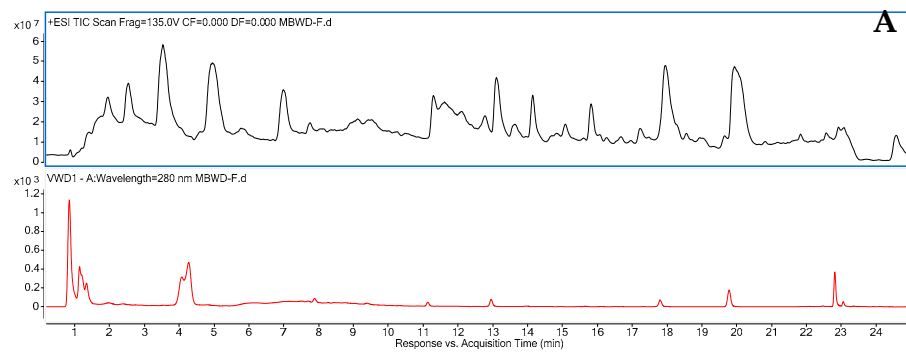

11

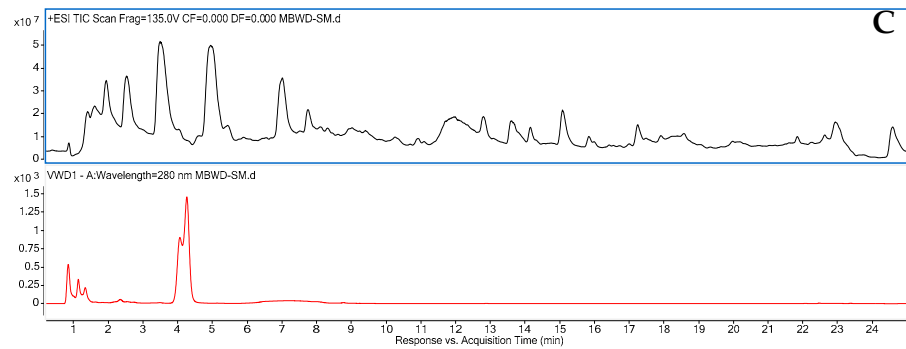

12

13

**Figure S2.** Typical UPLC chromatogram and mass spectrum of flavedo (A), albedo (B), segment membrane (C) and juice sacs (D) part of MBWD.

14

15

16

17

18

19

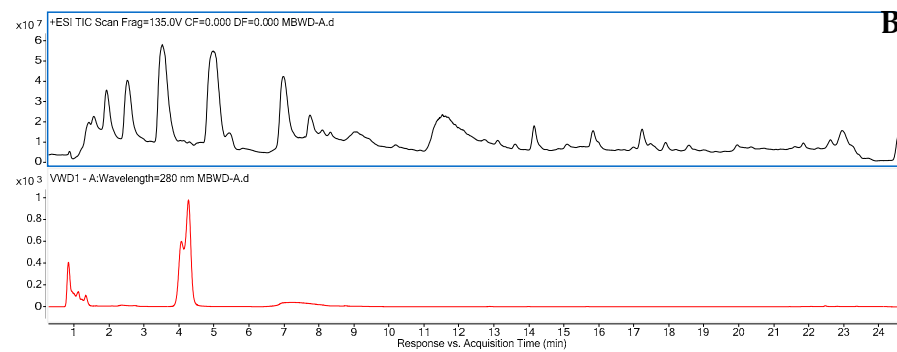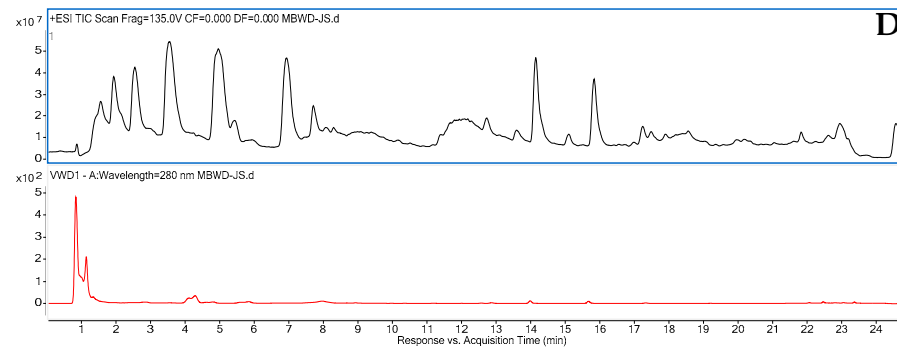

20

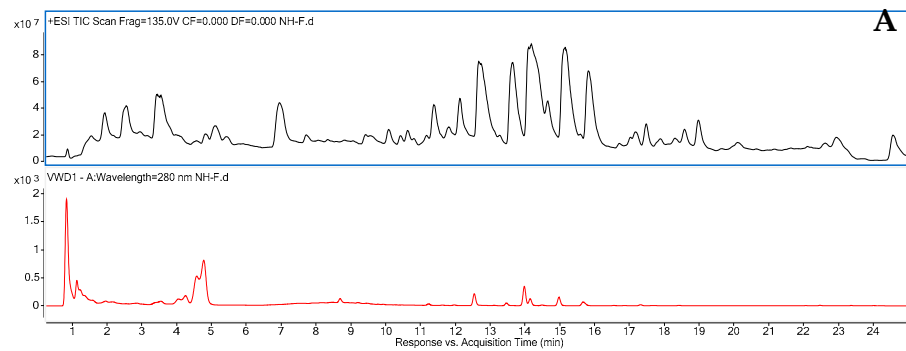

21

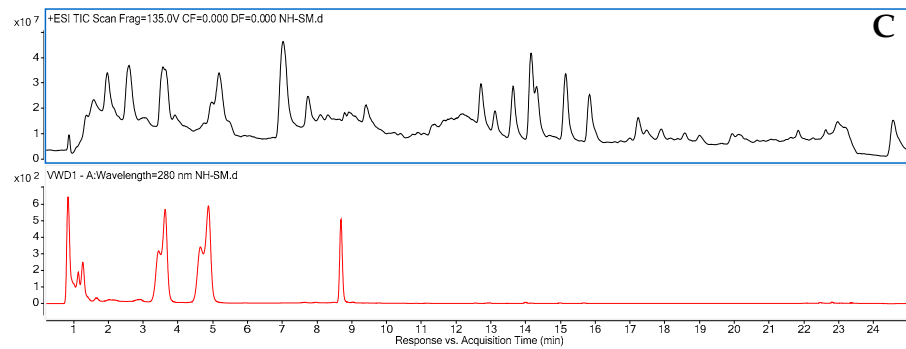

22

23

Figure S3. Typical UPLC chromatogram and mass spectrum of flavedo (A), albedo (B), segment membrane (C) and juice sacs (D) part of NH.

24

25

26

27

28

29

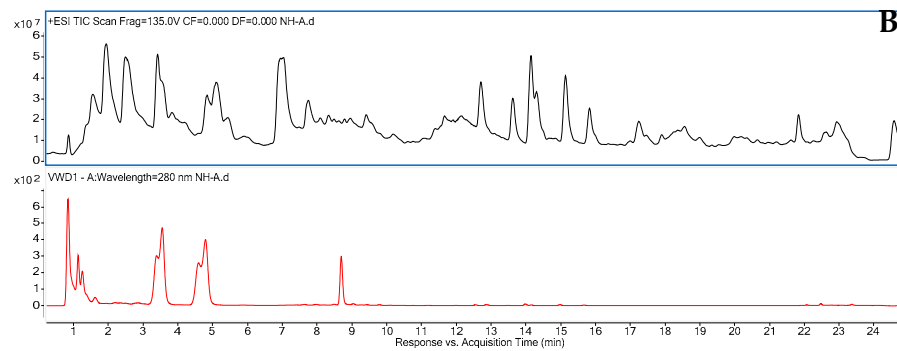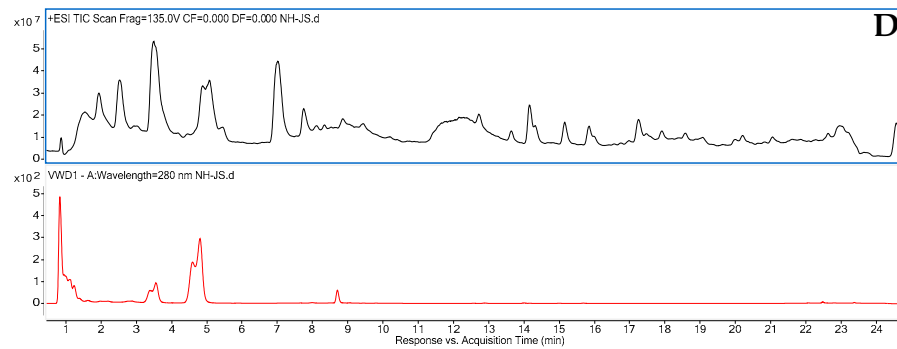

30

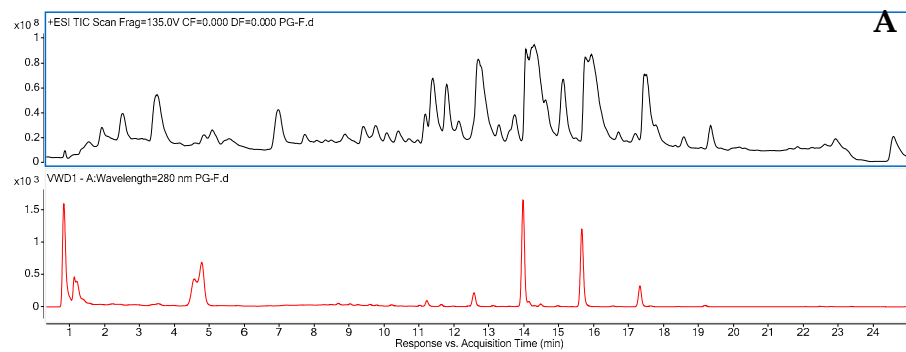

31

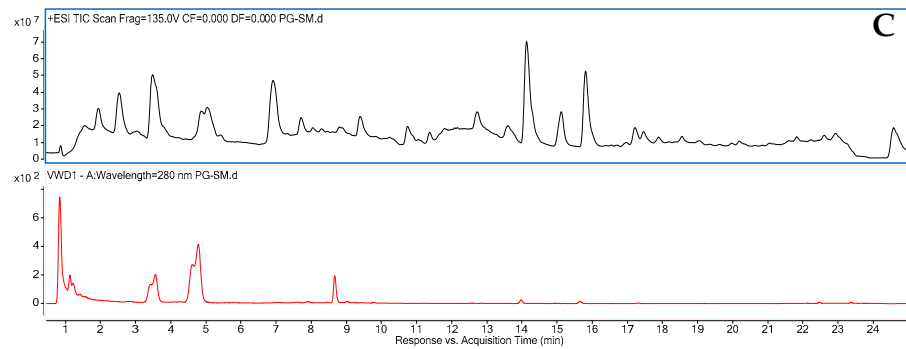

32

33

**Figure S4.** Typical UPLC chromatogram and mass spectrum of flavedo (A), albedo (B), segment membrane (C) and juice sacs (D) part of PG.

34

35

36

37

38

39

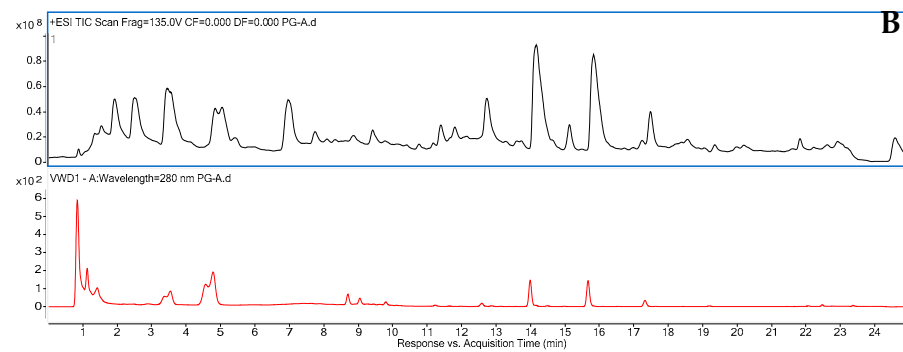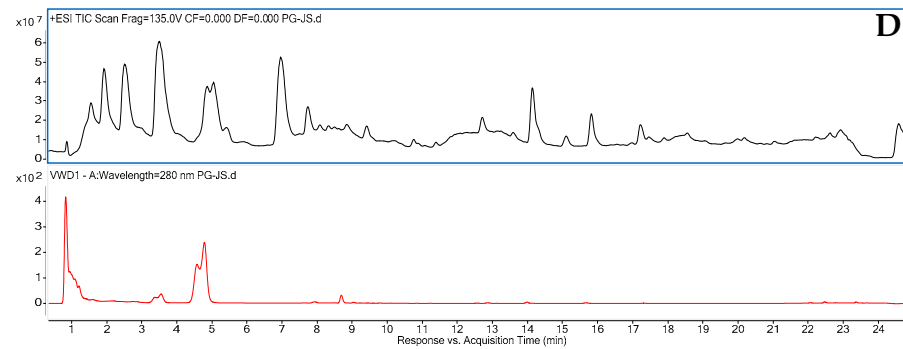

40

41

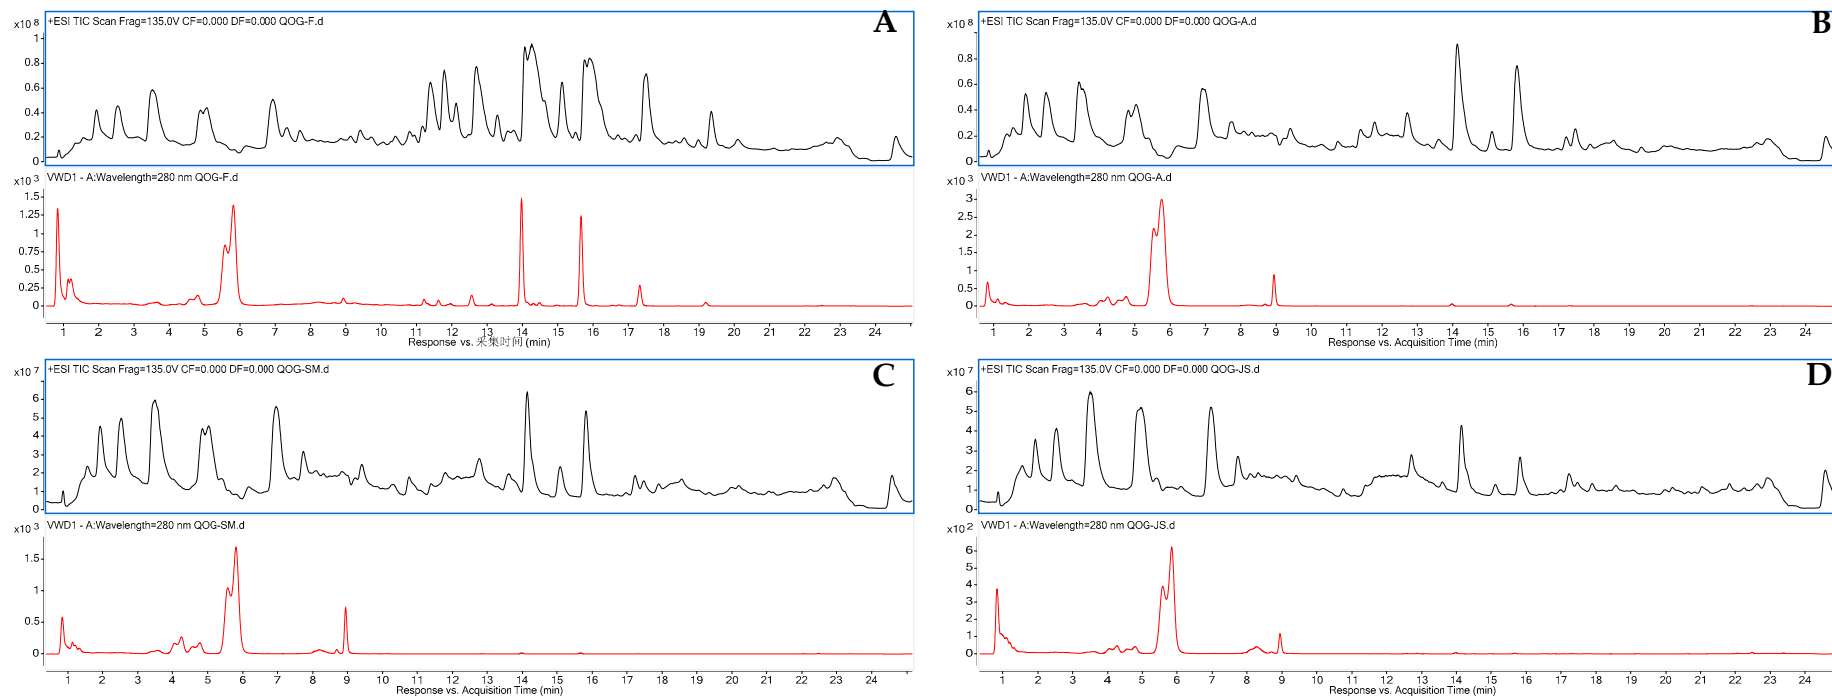

42

43

44

Figure S5. Typical UPLC chromatogram and mass spectrum of flavedo (A), albedo (B), segment membrane (C) and juice sacs (D) part of QOG.

45

46

47

48

49

**Table S1.** The flavone and flavanone contents (mg/g DW) in the flavedo of the 35 citrus cultivars.

| Cultivars | Vicenin-2   | Eriocitrin                  | Apigenin-8-C-glucoside   | Neoericitrin              | Diosmetin-6-C-glucoside  | Narirutin                     | Rhoifolin                 |
|-----------|-------------|-----------------------------|--------------------------|---------------------------|--------------------------|-------------------------------|---------------------------|
| AY27      | n.d.        | n.d.                        | n.d.                     | n.d.                      | n.d.                     | 1.28 ± 0.06 <sup>abcde</sup>  | n.d.                      |
| AY30      | n.d.        | n.d.                        | 2.76 ± 0.10 <sup>c</sup> | n.d.                      | n.d.                     | 3.89 ± 0.16 <sup>fgh</sup>    | n.d.                      |
| AY31      | n.d.        | n.d.                        | n.d.                     | n.d.                      | n.d.                     | 0.84 ± 0.04 <sup>abcd</sup>   | n.d.                      |
| BZH       | n.d.        | 4.52 ± 0.13 <sup>j</sup>    | n.d.                     | 1.48 ± 0.03 <sup>h</sup>  | 7.24 ± 0.11 <sup>c</sup> | 24.04 ± 1.24 <sup>n</sup>     | n.d.                      |
| CR        | n.d.        | 1.00 ± 0.06 <sup>def</sup>  | n.d.                     | n.d.                      | n.d.                     | 4.11 ± 0.31 <sup>gh</sup>     | n.d.                      |
| CX        | n.d.        | 0.14 ± 0.01 <sup>a</sup>    | n.d.                     | n.d.                      | n.d.                     | 4.52 ± 0.34 <sup>ghi</sup>    | n.d.                      |
| DF        | n.d.        | 0.56 ± 0.04 <sup>abcd</sup> | n.d.                     | 0.77 ± 0.07 <sup>f</sup>  | n.d.                     | 7.21 ± 0.29 <sup>jk</sup>     | n.d.                      |
| GAC       | n.d.        | 2.20 ± 0.03 <sup>h</sup>    | n.d.                     | 1.47 ± 0.03 <sup>cd</sup> | n.d.                     | 2.47 ± 0.23 <sup>bcdefg</sup> | n.d.                      |
| GN        | n.d.        | 4.78 ± 0.18 <sup>j</sup>    | 5.25 ± 0.29 <sup>d</sup> | 3.87 ± 0.09 <sup>f</sup>  | n.d.                     | 7.74 ± 0.26 <sup>jk</sup>     | n.d.                      |
| GOC       | n.d.        | 1.56 ± 0.05 <sup>g</sup>    | n.d.                     | 0.57 ± 0.04 <sup>i</sup>  | n.d.                     | 7.70 ± 0.24 <sup>jk</sup>     | n.d.                      |
| HMR       | n.d.        | 2.11 ± 0.08 <sup>h</sup>    | n.d.                     | n.d.                      | n.d.                     | 5.67 ± 0.35 <sup>hij</sup>    | n.d.                      |
| HY        | n.d.        | 0.21 ± 0.01 <sup>ab</sup>   | n.d.                     | 2.29 ± 0.19 <sup>bc</sup> | n.d.                     | 1.11 ± 0.07 <sup>abcde</sup>  | 0.37 ± 0.01 <sup>ab</sup> |
| KZJ22     | 2.57 ± 0.19 | 1.38 ± 0.11 <sup>fg</sup>   | 0.99 ± 0.03 <sup>a</sup> | n.d.                      | n.d.                     | 8.30 ± 0.49 <sup>kl</sup>     | n.d.                      |
| MBWD      | n.d.        | n.d.                        | n.d.                     | n.d.                      | n.d.                     | n.d.                          | 1.71 ± 0.09 <sup>d</sup>  |
| MTH       | n.d.        | n.d.                        | 1.57 ± 0.10 <sup>b</sup> | n.d.                      | n.d.                     | 2.68 ± 0.08 <sup>cdefg</sup>  | n.d.                      |
| MXG       | n.d.        | n.d.                        | n.d.                     | n.d.                      | 0.33 ± 0.01 <sup>a</sup> | 2.49 ± 0.22 <sup>bcdefg</sup> | 0.29 ± 0.01 <sup>a</sup>  |
| NG20      | n.d.        | 4.84 ± 0.34 <sup>j</sup>    | n.d.                     | 1.79 ± 0.11 <sup>g</sup>  | 4.87 ± 0.27 <sup>b</sup> | 13.50 ± 0.85 <sup>m</sup>     | n.d.                      |
| NH        | n.d.        | n.d.                        | n.d.                     | n.d.                      | n.d.                     | 6.54 ± 0.31 <sup>ijk</sup>    | n.d.                      |
| OG        | n.d.        | n.d.                        | n.d.                     | 0.27 ± 0.02 <sup>a</sup>  | n.d.                     | 0.88 ± 0.06 <sup>abcde</sup>  | n.d.                      |
| PG        | n.d.        | n.d.                        | 0.79 ± 0.04 <sup>a</sup> | n.d.                      | n.d.                     | 2.92 ± 0.15 <sup>defg</sup>   | n.d.                      |
| PTY       | n.d.        | 10.08 ± 0.57 <sup>k</sup>   | n.d.                     | 1.18 ± 0.10 <sup>e</sup>  | n.d.                     | 1.53 ± 0.10 <sup>abcde</sup>  | n.d.                      |
| QJ        | n.d.        | 3.78 ± 0.14 <sup>i</sup>    | n.d.                     | 2.31 ± 0.13 <sup>h</sup>  | n.d.                     | 31.68 ± 2.60 <sup>o</sup>     | n.d.                      |
| QOG       | n.d.        | n.d.                        | n.d.                     | 0.36 ± 0.02 <sup>ab</sup> | n.d.                     | 1.78 ± 0.10 <sup>abcdef</sup> | n.d.                      |
| RN1       | n.d.        | 0.74 ± 0.04 <sup>bcde</sup> | n.d.                     | 0.22 ± 0.00 <sup>a</sup>  | n.d.                     | 6.58 ± 0.37 <sup>ijk</sup>    | n.d.                      |
| SJY       | n.d.        | n.d.                        | n.d.                     | 0.18 ± 0.01 <sup>a</sup>  | 0.51 ± 0.02 <sup>a</sup> | 0.32 ± 0.01 <sup>a</sup>      | n.d.                      |
| SW        | n.d.        | n.d.                        | n.d.                     | n.d.                      | n.d.                     | 3.72 ± 0.25 <sup>fgh</sup>    | n.d.                      |
| SYXX      | n.d.        | n.d.                        | n.d.                     | n.d.                      | n.d.                     | 7.69 ± 0.44 <sup>jk</sup>     | n.d.                      |
| TC        | n.d.        | 1.00 ± 0.07 <sup>def</sup>  | n.d.                     | n.d.                      | n.d.                     | 24.34 ± 1.73 <sup>n</sup>     | n.d.                      |
| TCH       | n.d.        | n.d.                        | n.d.                     | n.d.                      | n.d.                     | 2.99 ± 0.18 <sup>efg</sup>    | n.d.                      |

|      |      |                            |      |                           |      |                              |                          |
|------|------|----------------------------|------|---------------------------|------|------------------------------|--------------------------|
| WHOG | n.d. | 0.84 ± 0.04 <sup>cde</sup> | n.d. | 1.01 ± 0.07 <sup>de</sup> | n.d. | 0.96 ± 0.06 <sup>abcde</sup> | n.d.                     |
| WZ   | n.d. | 1.23 ± 0.04 <sup>efg</sup> | n.d. | n.d.                      | n.d. | 10.05 ± 0.59 <sup>l</sup>    | n.d.                     |
| YHY  | n.d. | n.d.                       | n.d. | n.d.                      | n.d. | 0.62 ± 0.04 <sup>abc</sup>   | 0.50 ± 0.03 <sup>b</sup> |
| YL   | n.d. | 3.31 ± 0.18 <sup>i</sup>   | n.d. | 1.11 ± 0.07 <sup>e</sup>  | n.d. | 14.91 ± 0.74 <sup>m</sup>    | n.d.                     |
| YXC  | n.d. | 0.34 ± 0.02 <sup>abc</sup> | n.d. | n.d.                      | n.d. | 0.74 ± 0.04 <sup>abc</sup>   | n.d.                     |
| ZXY  | n.d. | n.d.                       | n.d. | n.d.                      | n.d. | 0.44 ± 0.02 <sup>ab</sup>    | 1.24 ± 0.08 <sup>c</sup> |

51

| Cultivars | Naringin                     | Hesperidin                    | Neohesperidin               | Didymin                    | Poncirin                  | Melitidin   |
|-----------|------------------------------|-------------------------------|-----------------------------|----------------------------|---------------------------|-------------|
| AY27      | 3.28 ± 0.18 <sup>ij</sup>    | 10.20 ± 0.30 <sup>fg</sup>    | 0.38 ± 0.01 <sup>abc</sup>  | 0.26 ± 0.01 <sup>ab</sup>  | 0.52 ± 0.02 <sup>c</sup>  | n.d.        |
| AY30      | 2.96 ± 0.06 <sup>hij</sup>   | 17.28 ± 1.07 <sup>klmn</sup>  | n.d.                        | 0.90 ± 0.00 <sup>cde</sup> | n.d.                      | n.d.        |
| AY31      | n.d.                         | 11.27 ± 0.64 <sup>fg</sup>    | 0.54 ± 0.04 <sup>abcd</sup> | 0.40 ± 0.03 <sup>abc</sup> | n.d.                      | n.d.        |
| BZH       | 2.07 ± 0.06 <sup>fg</sup>    | 16.67 ± 1.08 <sup>ijklm</sup> | 3.90 ± 0.20 <sup>e</sup>    | 3.05 ± 0.15 <sup>gh</sup>  | n.d.                      | n.d.        |
| CR        | 1.74 ± 0.05 <sup>defg</sup>  | 16.75 ± 0.81 <sup>ijklm</sup> | 1.73 ± 0.04 <sup>d</sup>    | 1.26 ± 0.06 <sup>de</sup>  | 0.77 ± 0.05 <sup>d</sup>  | n.d.        |
| CX        | n.d.                         | 9.00 ± 0.41 <sup>ef</sup>     | n.d.                        | 1.20 ± 0.10 <sup>de</sup>  | n.d.                      | n.d.        |
| DF        | 1.27 ± 0.03 <sup>bcde</sup>  | 15.86 ± 1.04 <sup>ijkl</sup>  | n.d.                        | 0.76 ± 0.05 <sup>bcd</sup> | n.d.                      | n.d.        |
| GAC       | 10.91 ± 0.51 <sup>r</sup>    | 3.41 ± 0.06 <sup>b</sup>      | 18.94 ± 0.78 <sup>g</sup>   | 0.51 ± 0.01 <sup>abc</sup> | 0.57 ± 0.03 <sup>cd</sup> | n.d.        |
| GN        | 7.02 ± 0.27 <sup>q</sup>     | 5.06 ± 0.16 <sup>bc</sup>     | 0.59 ± 0.01 <sup>abcd</sup> | n.d.                       | n.d.                      | n.d.        |
| GOC       | 1.00 ± 0.07 <sup>abcd</sup>  | 10.60 ± 0.68 <sup>fg</sup>    | 1.42 ± 0.02 <sup>cd</sup>   | 1.20 ± 0.03 <sup>de</sup>  | 0.21 ± 0.01 <sup>ab</sup> | n.d.        |
| HMR       | 1.55 ± 0.03 <sup>cdef</sup>  | 16.63 ± 1.12 <sup>ijklm</sup> | n.d.                        | 1.14 ± 0.06 <sup>de</sup>  | n.d.                      | n.d.        |
| HY        | 4.38 ± 0.33 <sup>lmn</sup>   | 0.65 ± 0.03 <sup>a</sup>      | 4.67 ± 0.22 <sup>e</sup>    | n.d.                       | 0.06 ± 0.00 <sup>a</sup>  | n.d.        |
| KZJ22     | 1.14 ± 0.05 <sup>abcde</sup> | 6.14 ± 0.54 <sup>cd</sup>     | 0.39 ± 0.02 <sup>abc</sup>  | 1.45 ± 0.08 <sup>e</sup>   | n.d.                      | n.d.        |
| MBWD      | 5.68 ± 0.37 <sup>op</sup>    | 0.22 ± 0.01 <sup>a</sup>      | 0.31 ± 0.02 <sup>abc</sup>  | 0.06 ± 0.00 <sup>a</sup>   | 0.06 ± 0.00 <sup>a</sup>  | n.d.        |
| MTH       | 0.60 ± 0.01 <sup>ab</sup>    | 12.18 ± 1.05 <sup>gh</sup>    | 0.59 ± 0.04 <sup>abcd</sup> | 1.21 ± 0.03 <sup>de</sup>  | n.d.                      | n.d.        |
| MXG       | 4.42 ± 0.28 <sup>mn</sup>    | 0.15 ± 0.01 <sup>a</sup>      | 0.05 ± 0.00 <sup>a</sup>    | 0.05 ± 0.00 <sup>a</sup>   | 0.05 ± 0.00 <sup>a</sup>  | 0.12 ± 0.00 |
| NG20      | n.d.                         | 17.39 ± 1.42 <sup>klmn</sup>  | n.d.                        | 2.81 ± 0.23 <sup>fg</sup>  | n.d.                      | n.d.        |
| NH        | 4.05 ± 0.28 <sup>klm</sup>   | 14.55 ± 0.59 <sup>ij</sup>    | 0.40 ± 0.02 <sup>abc</sup>  | 2.60 ± 0.20 <sup>fg</sup>  | n.d.                      | n.d.        |
| OG        | 3.27 ± 0.02 <sup>ij</sup>    | 5.98 ± 0.16 <sup>cd</sup>     | 22.22 ± 0.48 <sup>h</sup>   | n.d.                       | 1.96 ± 0.08 <sup>e</sup>  | n.d.        |
| PG        | 2.83 ± 0.10 <sup>hi</sup>    | 15.82 ± 0.84 <sup>ijkl</sup>  | 1.29 ± 0.08 <sup>bcd</sup>  | 0.51 ± 0.03 <sup>abc</sup> | n.d.                      | n.d.        |
| PTY       | 3.50 ± 0.29 <sup>ijk</sup>   | 0.81 ± 0.03 <sup>a</sup>      | 4.53 ± 0.29 <sup>e</sup>    | n.d.                       | 0.06 ± 0.00 <sup>a</sup>  | n.d.        |
| QJ        | 3.63 ± 0.23 <sup>ijkl</sup>  | 14.39 ± 0.77 <sup>hi</sup>    | 1.20 ± 0.10 <sup>abcd</sup> | 6.11 ± 0.47 <sup>i</sup>   | n.d.                      | n.d.        |
| QOG       | 5.03 ± 0.29 <sup>no</sup>    | 10.43 ± 0.77 <sup>fg</sup>    | 19.54 ± 0.64 <sup>g</sup>   | n.d.                       | 4.18 ± 0.20 <sup>f</sup>  | n.d.        |
| RN1       | 0.42 ± 0.00 <sup>a</sup>     | 5.02 ± 0.21 <sup>bc</sup>     | n.d.                        | 0.95 ± 0.03 <sup>cde</sup> | n.d.                      | n.d.        |

|      |                             |                             |                             |                            |                           |      |
|------|-----------------------------|-----------------------------|-----------------------------|----------------------------|---------------------------|------|
| SJY  | 2.84 ± 0.18 <sup>hi</sup>   | 0.34 ± 0.03 <sup>a</sup>    | 0.16 ± 0.00 <sup>ab</sup>   | 0.04 ± 0.00 <sup>a</sup>   | n.d.                      | n.d. |
| SW   | n.d.                        | 20.04 ± 0.89 <sup>o</sup>   | n.d.                        | 2.23 ± 0.13 <sup>f</sup>   | n.d.                      | n.d. |
| SYXX | n.d.                        | 19.34 ± 1.48 <sup>no</sup>  | 0.43 ± 0.04 <sup>abc</sup>  | 2.54 ± 0.12 <sup>fg</sup>  | n.d.                      | n.d. |
| TC   | 0.90 ± 0.06 <sup>abc</sup>  | 7.42 ± 0.53 <sup>de</sup>   | 0.96 ± 0.04 <sup>abcd</sup> | 11.55 ± 0.72 <sup>j</sup>  | n.d.                      | n.d. |
| TCH  | 0.88 ± 0.03 <sup>abc</sup>  | 17.73 ± 0.93 <sup>lmn</sup> | n.d.                        | 0.72 ± 0.04 <sup>bcd</sup> | 0.36 ± 0.02 <sup>bc</sup> | n.d. |
| WHOG | 2.35 ± 0.08 <sup>gh</sup>   | 7.57 ± 0.25 <sup>de</sup>   | 16.05 ± 1.44 <sup>f</sup>   | n.d.                       | 2.09 ± 0.20 <sup>e</sup>  | n.d. |
| WZ   | 0.93 ± 0.02 <sup>abc</sup>  | 18.26 ± 0.93 <sup>mno</sup> | n.d.                        | 1.31 ± 0.05 <sup>de</sup>  | n.d.                      | n.d. |
| YHY  | 6.41 ± 0.55 <sup>pq</sup>   | 0.16 ± 0.01 <sup>a</sup>    | n.d.                        | n.d.                       | n.d.                      | n.d. |
| YL   | 1.83 ± 0.03 <sup>efg</sup>  | 15.10 ± 0.45 <sup>ijk</sup> | n.d.                        | 3.57 ± 0.28 <sup>h</sup>   | n.d.                      | n.d. |
| YXC  | 1.03 ± 0.05 <sup>abcd</sup> | 6.44 ± 0.29 <sup>cd</sup>   | 0.16 ± 0.01 <sup>ab</sup>   | 0.72 ± 0.02 <sup>bcd</sup> | 0.19 ± 0.01 <sup>ab</sup> | n.d. |
| ZXY  | 6.33 ± 0.50 <sup>pq</sup>   | 0.14 ± 0.00 <sup>a</sup>    | n.d.                        | n.d.                       | n.d.                      | n.d. |

n.d. —not detected. Results were the mean ± SD (n = 3) on a dried weight (g) of citrus basis. Values within each column followed by different letters were significantly different  $p < 0.05$  according to Tukey's tests.

**Table S2.** The polymethoxylated flavonoid contents (mg/g DW) in the flavedo of the 35 citrus cultivars.

| Cultivars | Monohydroxy-trimethoxyflavone (1) | Gardenin B               | Monohydroxy-trimethoxyflavone (2) | trihydroxy-dimethoxyflavone | Monohydroxy-pentamethoxy flavone (1) | Isosinensetin                |
|-----------|-----------------------------------|--------------------------|-----------------------------------|-----------------------------|--------------------------------------|------------------------------|
| AY27      | 0.36 ± 0.01 <sup>c</sup>          | n.d.                     | 1.20 ± 0.07 <sup>c</sup>          | n.d.                        | n.d.                                 | 1.63 ± 0.11 <sup>lm</sup>    |
| AY30      | n.d.                              | 1.16 ± 0.07 <sup>b</sup> | 2.27 ± 0.19 <sup>d</sup>          | n.d.                        | 2.78 ± 0.10 <sup>e</sup>             | 5.45 ± 0.23 <sup>p</sup>     |
| AY31      | n.d.                              | n.d.                     | n.d.                              | n.d.                        | n.d.                                 | 0.34 ± 0.03 <sup>abcd</sup>  |
| BZH       | 0.38 ± 0.02 <sup>cd</sup>         | n.d.                     | n.d.                              | n.d.                        | n.d.                                 | 0.87 ± 0.06 <sup>fghi</sup>  |
| CR        | n.d.                              | 0.20 ± 0.01 <sup>d</sup> | n.d.                              | n.d.                        | n.d.                                 | 0.77 ± 0.06 <sup>efgh</sup>  |
| CX        | n.d.                              | n.d.                     | n.d.                              | n.d.                        | n.d.                                 | 0.58 ± 0.02 <sup>cdefg</sup> |
| DF        | n.d.                              | n.d.                     | n.d.                              | n.d.                        | n.d.                                 | n.d.                         |
| GAC       | n.d.                              | n.d.                     | n.d.                              | n.d.                        | n.d.                                 | 0.90 ± 0.05 <sup>ghi</sup>   |
| GN        | 0.43 ± 0.03 <sup>d</sup>          | n.d.                     | n.d.                              | n.d.                        | 0.40 ± 0.04 <sup>b</sup>             | 1.96 ± 0.15 <sup>mn</sup>    |



|      |                           |                          |                          |             |                           |                              |
|------|---------------------------|--------------------------|--------------------------|-------------|---------------------------|------------------------------|
| GOC  | n.d.                      | n.d.                     | n.d.                     | n.d.        | n.d.                      | 0.40 ± 0.02<br>abcde         |
| HMR  | n.d.                      | n.d.                     | n.d.                     | 3.78 ± 0.13 | n.d.                      | n.d.                         |
| HY   | n.d.                      | n.d.                     | n.d.                     | n.d.        | n.d.                      | 0.09 ± 0.00 <sup>a</sup>     |
| KZJ  | 0.28 ± 0.02 <sup>b</sup>  | n.d.                     | n.d.                     | n.d.        | 0.13 ± 0.01 <sup>a</sup>  | 0.99 ± 0.07 <sup>hij</sup>   |
| MBWD | n.d.                      | n.d.                     | n.d.                     | n.d.        | n.d.                      | 0.41 ± 0.04<br>abcde         |
| MTH  | n.d.                      | n.d.                     | n.d.                     | n.d.        | n.d.                      | 1.28 ± 0.07 <sup>jkl</sup>   |
| MXG  | n.d.                      | n.d.                     | n.d.                     | n.d.        | n.d.                      | 0.11 ± 0.00 <sup>a</sup>     |
| NG20 | 0.40 ± 0.03 <sup>cd</sup> | n.d.                     | n.d.                     | n.d.        | n.d.                      | 0.53 ± 0.01 <sup>cdefg</sup> |
| NH   | n.d.                      | 1.65 ± 0.05 <sup>a</sup> | n.d.                     | n.d.        | 0.51 ± 0.04 <sup>bc</sup> | 1.45 ± 0.02 <sup>kl</sup>    |
| OG   | n.d.                      | n.d.                     | n.d.                     | n.d.        | 0.68 ± 0.02 <sup>c</sup>  | 2.16 ± 0.13 <sup>n</sup>     |
| PG   | 0.64 ± 0.03 <sup>f</sup>  | n.d.                     | 0.52 ± 0.02 <sup>b</sup> | n.d.        | 0.68 ± 0.02 <sup>c</sup>  | 3.00 ± 0.19 <sup>o</sup>     |
| PTY  | n.d.                      | n.d.                     | n.d.                     | n.d.        | n.d.                      | n.d.                         |
| QJ   | 0.58 ± 0.01 <sup>e</sup>  | n.d.                     | n.d.                     | n.d.        | n.d.                      | 1.25 ± 0.07 <sup>ijk</sup>   |
| QOG  | n.d.                      | n.d.                     | n.d.                     | n.d.        | n.d.                      | 5.33 ± 0.48 <sup>p</sup>     |
| RN1  | 0.13 ± 0.01 <sup>a</sup>  | n.d.                     | n.d.                     | n.d.        | n.d.                      | 0.14 ± 0.01 <sup>ab</sup>    |
| SJY  | n.d.                      | n.d.                     | n.d.                     | n.d.        | n.d.                      | 0.14 ± 0.01 <sup>ab</sup>    |
| SW   | n.d.                      | n.d.                     | n.d.                     | n.d.        | n.d.                      | 0.28 ± 0.01 <sup>abc</sup>   |
| SYXX | n.d.                      | n.d.                     | n.d.                     | n.d.        | n.d.                      | 0.28 ± 0.02 <sup>abc</sup>   |
| TC   | n.d.                      | 0.56 ± 0.03 <sup>c</sup> | 0.25 ± 0.01 <sup>a</sup> | n.d.        | 1.65 ± 0.12 <sup>d</sup>  | 0.51 ± 0.01 <sup>bedef</sup> |
| TCH  | n.d.                      | n.d.                     | 0.25 ± 0.01 <sup>a</sup> | n.d.        | n.d.                      | 0.21 ± 0.01 <sup>abc</sup>   |
| WHOG | n.d.                      | n.d.                     | n.d.                     | n.d.        | n.d.                      | 1.90 ± 0.07 <sup>mn</sup>    |
| WZ   | n.d.                      | n.d.                     | n.d.                     | n.d.        | n.d.                      | 0.32 ± 0.02 <sup>abc</sup>   |
| YHY  | n.d.                      | n.d.                     | n.d.                     | n.d.        | n.d.                      | n.d.                         |
| YL   | n.d.                      | n.d.                     | n.d.                     | n.d.        | n.d.                      | 0.71 ± 0.05 <sup>defgh</sup> |
| YXC  | n.d.                      | n.d.                     | n.d.                     | n.d.        | n.d.                      | 0.27 ± 0.02 <sup>abc</sup>   |
| ZXY  | n.d.                      | n.d.                     | n.d.                     | n.d.        | n.d.                      | n.d.                         |

| Cultivars | Monohydroxy-trimethoxyflavone | Monohydroxy-pentamethoxyflavone(2) | Hexamethoxyflavone (1)     | Sinensetin                   | Tetramethyl-O-isoscutellarein | Dihydroxy-trimethoxyflavone |
|-----------|-------------------------------|------------------------------------|----------------------------|------------------------------|-------------------------------|-----------------------------|
| AY27      | n.d.                          | 0.27 ± 0.02 <sup>abc</sup>         | n.d.                       | 7.36 ± 0.41 <sup>ij</sup>    | 0.80 ± 0.03 <sup>gh</sup>     | n.d.                        |
| AY30      | n.d.                          | 1.13 ± 0.03 <sup>e</sup>           | n.d.                       | 33.89 ± 2.89 <sup>k</sup>    | n.d.                          | 12.04 ± 0.98 <sup>d</sup>   |
| AY31      | n.d.                          | n.d.                               | n.d.                       | 0.24 ± 0.01 <sup>ab</sup>    | 0.45 ± 0.01 <sup>cdefg</sup>  | n.d.                        |
| BZH       | n.d.                          | n.d.                               | n.d.                       | 0.68 ± 0.06 <sup>abcd</sup>  | 1.37 ± 0.07 <sup>i</sup>      | n.d.                        |
| CR        | n.d.                          | n.d.                               | 0.28 ± 0.01 <sup>g</sup>   | 6.33 ± 0.16 <sup>hi</sup>    | n.d.                          | n.d.                        |
| CX        | n.d.                          | n.d.                               | 0.15 ± 0.01 <sup>e</sup>   | 0.20 ± 0.02 <sup>a</sup>     | 0.83 ± 0.07 <sup>h</sup>      | n.d.                        |
| DF        | n.d.                          | n.d.                               | n.d.                       | 0.17 ± 0.01 <sup>a</sup>     | 0.19 ± 0.01 <sup>abcd</sup>   | n.d.                        |
| GAC       | n.d.                          | n.d.                               | n.d.                       | 0.61 ± 0.04 <sup>abcd</sup>  | 0.37 ± 0.01 <sup>abcdef</sup> | n.d.                        |
| GN        | n.d.                          | 0.47 ± 0.04 <sup>c</sup>           | n.d.                       | 2.16 ± 0.14 <sup>cdef</sup>  | 2.90 ± 0.13 <sup>k</sup>      | n.d.                        |
| GOC       | n.d.                          | n.d.                               | n.d.                       | 0.26 ± 0.02 <sup>ab</sup>    | 0.37 ± 0.01 <sup>bcdef</sup>  | n.d.                        |
| HMR       | n.d.                          | n.d.                               | n.d.                       | n.d.                         | n.d.                          | 0.34 ± 0.02 <sup>a</sup>    |
| HY        | n.d.                          | n.d.                               | n.d.                       | 0.07 ± 0.00 <sup>a</sup>     | 0.09 ± 0.01 <sup>ab</sup>     | n.d.                        |
| KZJ       | n.d.                          | 0.13 ± 0.00 <sup>a</sup>           | 0.09 ± 0.01 <sup>cd</sup>  | 0.56 ± 0.04 <sup>abcd</sup>  | 0.71 ± 0.03 <sup>fgh</sup>    | n.d.                        |
| MBWD      | n.d.                          | n.d.                               | n.d.                       | n.d.                         | n.d.                          | n.d.                        |
| MTH       | n.d.                          | 0.29 ± 0.01 <sup>abc</sup>         | n.d.                       | 2.01 ± 0.06 <sup>bedef</sup> | 0.64 ± 0.02 <sup>efgh</sup>   | n.d.                        |
| MXG       | n.d.                          | n.d.                               | 0.03 ± 0.00 <sup>a</sup>   | n.d.                         | 0.01 ± 0.00 <sup>a</sup>      | n.d.                        |
| NG20      | n.d.                          | n.d.                               | n.d.                       | 0.44 ± 0.01 <sup>abc</sup>   | 0.48 ± 0.02 <sup>defgh</sup>  | n.d.                        |
| NH        | 0.66 ± 0.03 <sup>b</sup>      | n.d.                               | 1.36 ± 0.04 <sup>i</sup>   | 8.33 ± 0.35 <sup>j</sup>     | n.d.                          | 0.89 ± 0.05 <sup>ab</sup>   |
| OG        | n.d.                          | 2.31 ± 0.17 <sup>f</sup>           | n.d.                       | 2.51 ± 0.03 <sup>ef</sup>    | 2.67 ± 0.16 <sup>j</sup>      | 0.68 ± 0.04 <sup>ab</sup>   |
| PG        | n.d.                          | 0.77 ± 0.02 <sup>d</sup>           | n.d.                       | 3.35 ± 0.05 <sup>fg</sup>    | 4.98 ± 0.28 <sup>l</sup>      | n.d.                        |
| PTY       | n.d.                          | n.d.                               | 0.05 ± 0.00 <sup>ab</sup>  | n.d.                         | 0.10 ± 0.01 <sup>abc</sup>    | n.d.                        |
| QJ        | n.d.                          | n.d.                               | 0.36 ± 0.02 <sup>h</sup>   | 0.72 ± 0.04 <sup>abcde</sup> | 1.49 ± 0.10 <sup>l</sup>      | n.d.                        |
| QOG       | 1.59 ± 0.05 <sup>c</sup>      | 4.51 ± 0.15 <sup>g</sup>           | n.d.                       | 4.91 ± 0.15 <sup>gh</sup>    | 5.30 ± 0.41 <sup>l</sup>      | 1.46 ± 0.11 <sup>b</sup>    |
| RN1       | n.d.                          | n.d.                               | 0.13 ± 0.01 <sup>de</sup>  | 0.12 ± 0.00 <sup>a</sup>     | 0.13 ± 0.01 <sup>abcd</sup>   | n.d.                        |
| SJY       | n.d.                          | n.d.                               | n.d.                       | 0.06 ± 0.00 <sup>a</sup>     | n.d.                          | n.d.                        |
| SW        | n.d.                          | n.d.                               | 0.12 ± 0.01 <sup>cde</sup> | n.d.                         | 0.21 ± 0.01 <sup>abcd</sup>   | n.d.                        |
| SYXX      | n.d.                          | n.d.                               | 0.22 ± 0.01 <sup>f</sup>   | 0.20 ± 0.00 <sup>a</sup>     | 0.31 ± 0.02 <sup>abcde</sup>  | n.d.                        |
| TC        | 0.17 ± 0.01 <sup>a</sup>      | 0.37 ± 0.03 <sup>bc</sup>          | 0.12 ± 0.01 <sup>de</sup>  | 3.34 ± 0.16 <sup>fg</sup>    | n.d.                          | 4.79 ± 0.05 <sup>c</sup>    |
| TCH       | n.d.                          | n.d.                               | n.d.                       | 1.32 ± 0.06 <sup>abcde</sup> | n.d.                          | n.d.                        |

|      |                          |                            |                           |                            |                              |                           |
|------|--------------------------|----------------------------|---------------------------|----------------------------|------------------------------|---------------------------|
| WHOG | 0.60 ± 0.02 <sup>b</sup> | 2.34 ± 0.14 <sup>f</sup>   | n.d.                      | 2.32 ± 0.12 <sup>def</sup> | 2.53 ± 0.13 <sup>j</sup>     | 0.70 ± 0.04 <sup>ab</sup> |
| WZ   | n.d.                     | 0.26 ± 0.01 <sup>abc</sup> | 0.21 ± 0.00 <sup>f</sup>  | 0.45 ± 0.02 <sup>abc</sup> | 0.30 ± 0.00 <sup>abcde</sup> | n.d.                      |
| YHY  | n.d.                     | n.d.                       | n.d.                      | 0.08 ± 0.01 <sup>a</sup>   | n.d.                         | n.d.                      |
| YL   | n.d.                     | 0.18 ± 0.01 <sup>ab</sup>  | 0.30 ± 0.02 <sup>g</sup>  | 0.43 ± 0.03 <sup>abc</sup> | 0.68 ± 0.04 <sup>fgh</sup>   | n.d.                      |
| YXC  | n.d.                     | 0.07 ± 0.00 <sup>a</sup>   | 0.07 ± 0.00 <sup>bc</sup> | n.d.                       | 0.38 ± 0.01 <sup>bcdef</sup> | n.d.                      |
| ZXY  | n.d.                     | n.d.                       | n.d.                      | n.d.                       | n.d.                         | n.d.                      |

60

61

| Cultivars | Hexamethoxyflavone (2)   | 5,7,3',4',5'-Pentamethoxyflavone | Nobiletin                     | Tetramethyl-O-scutellarein | 5,4'-Dihydroxyl-3,7,8,3'-tetramethoxyflavonol | 3,5,6,7,8,3',4'-Heptamethoxyflavone | Tangeretin                    |
|-----------|--------------------------|----------------------------------|-------------------------------|----------------------------|-----------------------------------------------|-------------------------------------|-------------------------------|
| AY27      | n.d.                     | 1.22 ± 0.07                      | 18.96 ± 0.77 <sup>mn</sup>    | 15.72 ± 1.01 <sup>j</sup>  | 0.50 ± 0.03 <sup>c</sup>                      | 1.58 ± 0.08 <sup>h</sup>            | 10.63 ± 0.54 <sup>h</sup>     |
| AY30      | n.d.                     | n.d.                             | 49.37 ± 3.93 <sup>q</sup>     | 13.54 ± 0.92 <sup>i</sup>  | 3.81 ± 0.12 <sup>h</sup>                      | 1.59 ± 0.10 <sup>h</sup>            | 25.04 ± 1.04 <sup>j</sup>     |
| AY31      | n.d.                     | n.d.                             | 5.72 ± 0.40 <sup>efghij</sup> | 0.53 ± 0.02 <sup>abc</sup> | 0.22 ± 0.01 <sup>ab</sup>                     | 0.77 ± 0.03 <sup>def</sup>          | 2.61 ± 0.13 <sup>bcdefg</sup> |
| BZH       | n.d.                     | n.d.                             | 8.41 ± 0.19 <sup>ijk</sup>    | 0.26 ± 0.01 <sup>abc</sup> | n.d.                                          | 3.78 ± 0.31 <sup>k</sup>            | 5.10 ± 0.10 <sup>g</sup>      |
| CR        | 1.37 ± 0.04 <sup>f</sup> | n.d.                             | 10.44 ± 0.62 <sup>k</sup>     | 3.35 ± 0.20 <sup>g</sup>   | 0.29 ± 0.02 <sup>b</sup>                      | 4.51 ± 0.14 <sup>l</sup>            | 2.50 ± 0.09 <sup>abcdef</sup> |
| CX        | n.d.                     | n.d.                             | 2.35 ± 0.06 <sup>abcde</sup>  | 0.12 ± 0.00 <sup>ab</sup>  | n.d.                                          | 0.62 ± 0.05 <sup>bcde</sup>         | 1.18 ± 0.09 <sup>abc</sup>    |
| DF        | n.d.                     | n.d.                             | 2.90 ± 0.16 <sup>abcdef</sup> | 0.27 ± 0.02 <sup>abc</sup> | n.d.                                          | 3.31 ± 0.05 <sup>ij</sup>           | 1.67 ± 0.11 <sup>abcde</sup>  |
| GAC       | n.d.                     | n.d.                             | 6.38 ± 0.37 <sup>fghij</sup>  | n.d.                       | n.d.                                          | 0.61 ± 0.05 <sup>bcde</sup>         | 2.57 ± 0.23 <sup>bcdefg</sup> |
| GN        | n.d.                     | n.d.                             | 18.09 ± 0.57 <sup>m</sup>     | 1.07 ± 0.06 <sup>cde</sup> | 0.72 ± 0.05 <sup>d</sup>                      | 0.38 ± 0.02 <sup>abcd</sup>         | 14.69 ± 0.48 <sup>i</sup>     |
| GOC       | n.d.                     | n.d.                             | 3.75 ± 0.25 <sup>bcdefg</sup> | 0.11 ± 0.01 <sup>ab</sup>  | n.d.                                          | 1.05 ± 0.06 <sup>efg</sup>          | 1.65 ± 0.09 <sup>abcd</sup>   |
| HMR       | n.d.                     | n.d.                             | 0.36 ± 0.03 <sup>ab</sup>     | n.d.                       | n.d.                                          | n.d.                                | n.d.                          |
| HY        | n.d.                     | n.d.                             | 0.87 ± 0.08 <sup>abc</sup>    | 0.06 ± 0.00 <sup>a</sup>   | 0.07 ± 0.00 <sup>a</sup>                      | 0.30 ± 0.02 <sup>abc</sup>          | 0.54 ± 0.03 <sup>ab</sup>     |
| KZJ       | n.d.                     | n.d.                             | 7.70 ± 0.18 <sup>hijk</sup>   | 0.14 ± 0.01 <sup>ab</sup>  | n.d.                                          | 0.77 ± 0.06 <sup>def</sup>          | 3.78 ± 0.18 <sup>defg</sup>   |
| MBWD      | n.d.                     | n.d.                             | 0.09 ± 0.00 <sup>a</sup>      | n.d.                       | n.d.                                          | n.d.                                | 0.08 ± 0.00 <sup>a</sup>      |
| MTH       | n.d.                     | n.d.                             | 21.83 ± 1.07 <sup>n</sup>     | 0.29 ± 0.01 <sup>abc</sup> | n.d.                                          | 2.85 ± 0.13 <sup>i</sup>            | 4.24 ± 0.22 <sup>efg</sup>    |
| MXG       | n.d.                     | n.d.                             | 0.10 ± 0.01 <sup>a</sup>      | n.d.                       | n.d.                                          | 0.51 ± 0.03 <sup>abcd</sup>         | 0.16 ± 0.01 <sup>a</sup>      |
| NG20      | n.d.                     | n.d.                             | 4.36 ± 0.11 <sup>cdefgh</sup> | 0.95 ± 0.02 <sup>bcd</sup> | n.d.                                          | 3.31 ± 0.06 <sup>j</sup>            | 1.86 ± 0.09 <sup>abcdef</sup> |
| NH        | 2.05 ± 0.12 <sup>g</sup> | n.d.                             | 14.15 ± 0.23 <sup>l</sup>     | 4.79 ± 0.29 <sup>h</sup>   | n.d.                                          | 5.69 ± 0.15 <sup>m</sup>            | 3.47 ± 0.20 <sup>cdefg</sup>  |

|      |                            |      |                               |                            |                           |                              |                               |
|------|----------------------------|------|-------------------------------|----------------------------|---------------------------|------------------------------|-------------------------------|
| OG   | n.d.                       | n.d. | 42.20 ± 2.23 <sup>p</sup>     | 1.62 ± 0.08 <sup>de</sup>  | 1.42 ± 0.07 <sup>f</sup>  | 0.70 ± 0.07 <sup>cdef</sup>  | 33.95 ± 1.72 <sup>kl</sup>    |
| PG   | n.d.                       | n.d. | 45.52 ± 1.21 <sup>p</sup>     | 1.72 ± 0.05 <sup>de</sup>  | 0.97 ± 0.05 <sup>e</sup>  | 0.47 ± 0.02 <sup>abcd</sup>  | 31.62 ± 2.20 <sup>k</sup>     |
| PTY  | 0.11 ± 0.01 <sup>ab</sup>  | n.d. | 0.33 ± 0.02 <sup>ab</sup>     | 0.05 ± 0.00 <sup>a</sup>   | n.d.                      | 0.26 ± 0.02 <sup>abc</sup>   | 0.30 ± 0.00 <sup>a</sup>      |
| QJ   | 0.34 ± 0.00 <sup>e</sup>   | n.d. | 8.78 ± 0.81 <sup>jk</sup>     | 0.36 ± 0.03 <sup>abc</sup> | n.d.                      | 6.02 ± 0.20 <sup>mn</sup>    | 4.41 ± 0.37 <sup>fg</sup>     |
| QOG  | n.d.                       | n.d. | 50.06 ± 3.21 <sup>q</sup>     | 2.79 ± 0.02 <sup>g</sup>   | 2.55 ± 0.03 <sup>g</sup>  | 0.65 ± 0.03 <sup>bcdef</sup> | 43.42 ± 0.73 <sup>m</sup>     |
| RN1  | 0.05 ± 0.00 <sup>a</sup>   | n.d. | 1.61 ± 0.07 <sup>abcd</sup>   | 0.05 ± 0.00 <sup>a</sup>   | n.d.                      | 1.50 ± 0.12 <sup>gh</sup>    | 0.68 ± 0.01 <sup>ab</sup>     |
| SJY  | n.d.                       | n.d. | 0.23 ± 0.01 <sup>ab</sup>     | 0.14 ± 0.01 <sup>ab</sup>  | n.d.                      | 0.11 ± 0.00 <sup>a</sup>     | 0.17 ± 0.01 <sup>a</sup>      |
| SW   | 0.18 ± 0.00 <sup>bc</sup>  | n.d. | 1.20 ± 0.04 <sup>abc</sup>    | 0.12 ± 0.01 <sup>ab</sup>  | n.d.                      | 1.66 ± 0.08 <sup>h</sup>     | 0.65 ± 0.03 <sup>ab</sup>     |
| SYXX | 0.20 ± 0.01 <sup>bc</sup>  | n.d. | 2.56 ± 0.12 <sup>abcde</sup>  | 0.19 ± 0.01 <sup>ab</sup>  | n.d.                      | 4.62 ± 0.08 <sup>l</sup>     | 1.23 ± 0.08 <sup>abcd</sup>   |
| TC   | 0.24 ± 0.01 <sup>cde</sup> | n.d. | 4.93 ± 0.16 <sup>defghi</sup> | 0.68 ± 0.04 <sup>abc</sup> | 1.51 ± 0.09 <sup>f</sup>  | 0.27 ± 0.02 <sup>abc</sup>   | 3.05 ± 0.21 <sup>bcdefg</sup> |
| TCH  | 0.31 ± 0.03 <sup>de</sup>  | n.d. | 1.61 ± 0.11 <sup>abcd</sup>   | 2.60 ± 0.08 <sup>fg</sup>  | n.d.                      | 1.11 ± 0.05 <sup>fg</sup>    | 1.10 ± 0.08 <sup>abc</sup>    |
| WHOG | n.d.                       | n.d. | 35.44 ± 2.16 <sup>o</sup>     | 1.84 ± 0.09 <sup>ef</sup>  | 0.73 ± 0.02 <sup>d</sup>  | 0.51 ± 0.01 <sup>abcd</sup>  | 35.00 ± 3.16 <sup>l</sup>     |
| WZ   | n.d.                       | n.d. | 5.17 ± 0.10 <sup>efghi</sup>  | 0.32 ± 0.01 <sup>abc</sup> | 0.60 ± 0.02 <sup>cd</sup> | 6.24 ± 0.56 <sup>n</sup>     | 2.26 ± 0.13 <sup>abcdef</sup> |
| YHY  | n.d.                       | n.d. | 0.39 ± 0.02 <sup>ab</sup>     | n.d.                       | n.d.                      | 0.10 ± 0.00 <sup>a</sup>     | n.d.                          |
| YL   | 0.23 ± 0.01 <sup>bcd</sup> | n.d. | 5.53 ± 0.32 <sup>efghij</sup> | 0.17 ± 0.00 <sup>ab</sup>  | n.d.                      | 3.41 ± 0.23 <sup>jk</sup>    | 2.47 ± 0.24 <sup>abcdef</sup> |
| YXC  | n.d.                       | n.d. | 6.89 ± 0.33 <sup>ghij</sup>   | 0.11 ± 0.01 <sup>ab</sup>  | n.d.                      | 0.21 ± 0.01 <sup>ab</sup>    | 2.38 ± 0.11 <sup>abcdef</sup> |
| ZXY  | n.d.                       | n.d. | 0.07 ± 0.00 <sup>a</sup>      | n.d.                       | n.d.                      | n.d.                         | n.d.                          |

62

| Cultivars | 6-O-Desmethyleritin/7-O-Desmethyleritin | Hexamethoxyflavone       | 5-Hydroxy-6,7,8,3',4'-pentamethoxyflavone | Monohydroxy-trimethoxyflavone (3) | Monohydroxy-pentamethoxyflavone (3) | Natsudaoidai               | 5-Hydroxy-7,8,3',4'-tetramethoxyflavone |
|-----------|-----------------------------------------|--------------------------|-------------------------------------------|-----------------------------------|-------------------------------------|----------------------------|-----------------------------------------|
| AY27      | n.d.                                    | n.d.                     | 3.34 ± 0.15 <sup>e</sup>                  | 0.83 ± 0.05 <sup>c</sup>          | n.d.                                | 0.20 ± 0.01 <sup>abc</sup> | n.d.                                    |
| AY30      | 1.45 ± 0.13 <sup>e</sup>                | n.d.                     | 14.22 ± 0.91 <sup>i</sup>                 | 1.12 ± 0.06 <sup>d</sup>          | n.d.                                | n.d.                       | n.d.                                    |
| AY31      | n.d.                                    | n.d.                     | 0.59 ± 0.06 <sup>abc</sup>                | n.d.                              | n.d.                                | n.d.                       | n.d.                                    |
| BZH       | n.d.                                    | 0.88 ± 0.05 <sup>e</sup> | 1.95 ± 0.05 <sup>d</sup>                  | n.d.                              | n.d.                                | 0.35 ± 0.01 <sup>cd</sup>  | n.d.                                    |
| CR        | n.d.                                    | n.d.                     | 0.56 ± 0.02 <sup>abc</sup>                | n.d.                              | n.d.                                | n.d.                       | n.d.                                    |
| CX        | n.d.                                    | n.d.                     | n.d.                                      | n.d.                              | n.d.                                | n.d.                       | n.d.                                    |
| DF        | n.d.                                    | n.d.                     | 0.34 ± 0.02 <sup>ab</sup>                 | n.d.                              | n.d.                                | 0.44 ± 0.01 <sup>de</sup>  | n.d.                                    |
| GAC       | n.d.                                    | n.d.                     | 0.49 ± 0.04 <sup>abc</sup>                | n.d.                              | n.d.                                | n.d.                       | n.d.                                    |

|      |                           |                          |                            |                          |                          |                            |                          |
|------|---------------------------|--------------------------|----------------------------|--------------------------|--------------------------|----------------------------|--------------------------|
| GN   | 0.24 ± 0.02 <sup>b</sup>  | n.d.                     | 5.67 ± 0.24 <sup>f</sup>   | 0.26 ± 0.02 <sup>a</sup> | n.d.                     | n.d.                       | 0.27 ± 0.00 <sup>a</sup> |
| GOC  | n.d.                      | 0.38 ± 0.01 <sup>d</sup> | 0.47 ± 0.03 <sup>abc</sup> | n.d.                     | n.d.                     | 0.15 ± 0.01 <sup>ab</sup>  | n.d.                     |
| HMR  | 0.14 ± 0.01 <sup>ab</sup> | n.d.                     | n.d.                       | n.d.                     | n.d.                     | n.d.                       | n.d.                     |
| HY   | n.d.                      | n.d.                     | 0.12 ± 0.01 <sup>a</sup>   | n.d.                     | n.d.                     | 0.09 ± 0.00 <sup>a</sup>   | n.d.                     |
| KZJ  | n.d.                      | n.d.                     | 0.50 ± 0.02 <sup>abc</sup> | n.d.                     | n.d.                     | n.d.                       | n.d.                     |
| MBWD | n.d.                      | n.d.                     | n.d.                       | n.d.                     | n.d.                     | 0.09 ± 0.01 <sup>a</sup>   | n.d.                     |
| MTH  | n.d.                      | n.d.                     | 1.29 ± 0.06 <sup>cd</sup>  | n.d.                     | n.d.                     | n.d.                       | n.d.                     |
| MXG  | n.d.                      | n.d.                     | 0.08 ± 0.00 <sup>a</sup>   | n.d.                     | n.d.                     | n.d.                       | n.d.                     |
| NG20 | n.d.                      | n.d.                     | 0.43 ± 0.03 <sup>abc</sup> | n.d.                     | 0.88 ± 0.02 <sup>c</sup> | 0.65 ± 0.01 <sup>f</sup>   | n.d.                     |
| NH   | 0.46 ± 0.01 <sup>c</sup>  | n.d.                     | 1.09 ± 0.10 <sup>bcd</sup> | 0.67 ± 0.05 <sup>b</sup> | n.d.                     | 0.55 ± 0.03 <sup>ef</sup>  | n.d.                     |
| OG   | n.d.                      | n.d.                     | 8.97 ± 0.35 <sup>gh</sup>  | n.d.                     | n.d.                     | n.d.                       | 1.14 ± 0.06 <sup>b</sup> |
| PG   | n.d.                      | n.d.                     | 9.52 ± 0.19 <sup>h</sup>   | n.d.                     | n.d.                     | n.d.                       | n.d.                     |
| PTY  | n.d.                      | n.d.                     | 0.09 ± 0.00 <sup>a</sup>   | n.d.                     | n.d.                     | 0.08 ± 0.00 <sup>a</sup>   | n.d.                     |
| QJ   | 1.04 ± 0.01 <sup>d</sup>  | 0.36 ± 0.03 <sup>d</sup> | 0.69 ± 0.03 <sup>abc</sup> | n.d.                     | n.d.                     | 0.33 ± 0.02 <sup>cd</sup>  | n.d.                     |
| QOG  | n.d.                      | n.d.                     | 17.17 ± 0.97 <sup>j</sup>  | n.d.                     | n.d.                     | n.d.                       | 2.21 ± 0.13 <sup>d</sup> |
| RN1  | 0.05 ± 0.00 <sup>a</sup>  | 0.04 ± 0.00 <sup>a</sup> | 0.10 ± 0.00 <sup>a</sup>   | n.d.                     | 0.04 ± 0.00 <sup>a</sup> | 0.09 ± 0.00 <sup>a</sup>   | n.d.                     |
| SJY  | n.d.                      | n.d.                     | 0.10 ± 0.01 <sup>a</sup>   | n.d.                     | n.d.                     | n.d.                       | n.d.                     |
| SW   | n.d.                      | 0.12 ± 0.00 <sup>b</sup> | 0.11 ± 0.01 <sup>a</sup>   | n.d.                     | 0.09 ± 0.01 <sup>b</sup> | 0.19 ± 0.00 <sup>abc</sup> | n.d.                     |
| SYXX | n.d.                      | 0.18 ± 0.01 <sup>c</sup> | 0.27 ± 0.02 <sup>ab</sup>  | n.d.                     | n.d.                     | 1.97 ± 0.19 <sup>h</sup>   | n.d.                     |
| TC   | n.d.                      | n.d.                     | 2.00 ± 0.12 <sup>d</sup>   | n.d.                     | n.d.                     | 0.28 ± 0.01 <sup>bcd</sup> | n.d.                     |
| TCH  | n.d.                      | n.d.                     | n.d.                       | n.d.                     | n.d.                     | n.d.                       | n.d.                     |
| WHOG | n.d.                      | n.d.                     | 8.50 ± 0.58 <sup>g</sup>   | n.d.                     | n.d.                     | n.d.                       | 1.45 ± 0.07 <sup>c</sup> |
| WZ   | n.d.                      | n.d.                     | 0.61 ± 0.01 <sup>abc</sup> | n.d.                     | n.d.                     | 1.24 ± 0.10 <sup>g</sup>   | n.d.                     |
| YHY  | n.d.                      | n.d.                     | n.d.                       | n.d.                     | n.d.                     | n.d.                       | n.d.                     |
| YL   | n.d.                      | n.d.                     | 0.35 ± 0.02 <sup>ab</sup>  | n.d.                     | n.d.                     | 0.19 ± 0.01 <sup>abc</sup> | n.d.                     |
| YXC  | n.d.                      | n.d.                     | 0.45 ± 0.02 <sup>abc</sup> | n.d.                     | n.d.                     | n.d.                       | n.d.                     |
| ZXY  | n.d.                      | n.d.                     | n.d.                       | n.d.                     | n.d.                     | n.d.                       | n.d.                     |

n.d. —not detected. Results were the mean ± SD (n = 3) on a dried weight (g) of citrus basis. Values within each column followed by different letters were significantly different  $p < 0.05$  according to Tukey's tests.

63  
64

65

**Table S3.** The flavone and flavanone contents (mg/g DW) in the albedo of the 35 citrus cultivars.

| Cultivars | Vicenin-2   | Eriocitrin                 | Apigenin-8-C-glucoside    | Neoericitrin               | Diosmetin-6-C-glucoside  | Narirutin                      |
|-----------|-------------|----------------------------|---------------------------|----------------------------|--------------------------|--------------------------------|
| AY27      | n.d.        | n.d.                       | n.d.                      | n.d.                       | n.d.                     | 2.27 ± 0.33 <sup>a</sup>       |
| AY30      | n.d.        | n.d.                       | 2.43 ± 0.28 <sup>bc</sup> | n.d.                       | n.d.                     | 10.00 ± 1.45 <sup>defghi</sup> |
| AY31      | n.d.        | n.d.                       | n.d.                      | n.d.                       | n.d.                     | 3.45 ± 0.43 <sup>abc</sup>     |
| BZH       | n.d.        | 5.46 ± 0.47 <sup>e</sup>   | n.d.                      | 1.66 ± 0.18 <sup>abc</sup> | 9.05 ± 1.32 <sup>a</sup> | 14.25 ± 2.46 <sup>ghijk</sup>  |
| CR        | n.d.        | 0.82 ± 0.09 <sup>ab</sup>  | n.d.                      | n.d.                       | n.d.                     | 3.99 ± 0.56 <sup>abc</sup>     |
| CX        | n.d.        | 0.25 ± 0.04 <sup>a</sup>   | n.d.                      | n.d.                       | n.d.                     | 5.61 ± 0.59 <sup>abcd</sup>    |
| DF        | n.d.        | 0.54 ± 0.06 <sup>a</sup>   | n.d.                      | 0.76 ± 0.08 <sup>abc</sup> | n.d.                     | 18.43 ± 2.81 <sup>kl</sup>     |
| GAC       | n.d.        | 1.42 ± 0.08 <sup>abc</sup> | n.d.                      | 10.12 ± 1.49 <sup>e</sup>  | n.d.                     | 1.53 ± 0.15 <sup>a</sup>       |
| GN        | n.d.        | 15.30 ± 2.25 <sup>f</sup>  | 17.32 ± 1.57 <sup>d</sup> | 13.07 ± 0.89 <sup>f</sup>  | n.d.                     | 22.7 ± 1.47 <sup>l</sup>       |
| GOC       | n.d.        | 1.78 ± 0.32 <sup>abc</sup> | n.d.                      | 0.72 ± 0.05 <sup>abc</sup> | n.d.                     | 17.18 ± 2.74 <sup>ijkl</sup>   |
| HMR       | n.d.        | 1.78 ± 0.13 <sup>abc</sup> | n.d.                      | n.d.                       | n.d.                     | 8.31 ± 1.29 <sup>bcdef</sup>   |
| HY        | n.d.        | 0.23 ± 0.02 <sup>a</sup>   | n.d.                      | 2.05 ± 0.16 <sup>c</sup>   | n.d.                     | 1.54 ± 0.23 <sup>a</sup>       |
| KZJ       | 6.84 ± 0.21 | 5.35 ± 0.48 <sup>e</sup>   | 3.93 ± 0.63 <sup>c</sup>  | n.d.                       | n.d.                     | 19.39 ± 0.48 <sup>kl</sup>     |
| MBWD      | n.d.        | n.d.                       | n.d.                      | n.d.                       | n.d.                     | n.d.                           |
| MTH       | n.d.        | n.d.                       | 0.65 ± 0.10 <sup>ab</sup> | n.d.                       | n.d.                     | 0.69 ± 0.10 <sup>a</sup>       |
| MXG       | n.d.        | n.d.                       | n.d.                      | n.d.                       | n.d.                     | n.d.                           |
| NG20      | n.d.        | 3.86 ± 0.56 <sup>de</sup>  | n.d.                      | 1.57 ± 0.25 <sup>abc</sup> | 4.65 ± 0.37 <sup>b</sup> | 11.55 ± 0.72 <sup>efghij</sup> |
| NH        | n.d.        | n.d.                       | n.d.                      | n.d.                       | n.d.                     | 6.13 ± 0.71 <sup>abcde</sup>   |
| OG        | n.d.        | n.d.                       | n.d.                      | 0.17 ± 0.02 <sup>a</sup>   | n.d.                     | 0.57 ± 0.04 <sup>a</sup>       |
| PG        | n.d.        | n.d.                       | 0.35 ± 0.04 <sup>a</sup>  | n.d.                       | n.d.                     | 1.72 ± 0.15 <sup>a</sup>       |
| PTY       | n.d.        | 3.14 ± 0.38 <sup>cd</sup>  | n.d.                      | 4.21 ± 0.55 <sup>d</sup>   | n.d.                     | 3.02 ± 0.18 <sup>ab</sup>      |
| QJ        | n.d.        | 2.48 ± 0.23 <sup>bcd</sup> | n.d.                      | 1.81 ± 0.19 <sup>bc</sup>  | n.d.                     | 8.95 ± 1.01 <sup>cdefg</sup>   |
| QOG       | n.d.        | n.d.                       | n.d.                      | 0.12 ± 0.02 <sup>a</sup>   | n.d.                     | 0.59 ± 0.08 <sup>a</sup>       |
| RN1       | n.d.        | 2.32 ± 0.09 <sup>bcd</sup> | n.d.                      | 0.86 ± 0.11 <sup>abc</sup> | n.d.                     | 9.02 ± 1.31 <sup>cdefgh</sup>  |
| SJY       | n.d.        | n.d.                       | n.d.                      | n.d.                       | n.d.                     | n.d.                           |
| SW        | n.d.        | n.d.                       | n.d.                      | n.d.                       | n.d.                     | 15.76 ± 1.77 <sup>ijk</sup>    |
| SYXX      | n.d.        | n.d.                       | n.d.                      | n.d.                       | n.d.                     | 15.95 ± 1.06 <sup>jk</sup>     |
| TC        | n.d.        | 0.15 ± 0.02 <sup>a</sup>   | n.d.                      | n.d.                       | n.d.                     | 62.94 ± 7.71 <sup>m</sup>      |
| TCH       | n.d.        | n.d.                       | n.d.                      | n.d.                       | n.d.                     | 14.86 ± 1.00 <sup>hijk</sup>   |
| WHOG      | n.d.        | 0.25 ± 0.02 <sup>a</sup>   | n.d.                      | 0.30 ± 0.01 <sup>ab</sup>  | n.d.                     | 0.28 ± 0.03 <sup>a</sup>       |

|     |      |                           |      |                            |      |                                |
|-----|------|---------------------------|------|----------------------------|------|--------------------------------|
| WZ  | n.d. | 0.97 ± 0.03 <sup>ab</sup> | n.d. | n.d.                       | n.d. | 13.61 ± 1.40 <sup>fghijk</sup> |
| YHY | n.d. | n.d.                      | n.d. | n.d.                       | n.d. | n.d.                           |
| YL  | n.d. | 3.96 ± 0.13 <sup>de</sup> | n.d. | 1.48 ± 0.20 <sup>abc</sup> | n.d. | 13.54 ± 0.46 <sup>fghijk</sup> |
| YXC | n.d. | 0.42 ± 0.02 <sup>a</sup>  | n.d. | n.d.                       | n.d. | 2.78 ± 0.23 <sup>ab</sup>      |
| ZXY | n.d. | n.d.                      | n.d. | n.d.                       | n.d. | n.d.                           |

66

| Cultivars | Rhoifolin   | Naringin                    | Hesperidin                   | Neohesperidin              | Didymin                       | Poncirin                  |
|-----------|-------------|-----------------------------|------------------------------|----------------------------|-------------------------------|---------------------------|
| AY27      | n.d.        | 0.84 ± 0.03 <sup>a</sup>    | 9.71 ± 0.84 <sup>cde</sup>   | 0.37 ± 0.06 <sup>a</sup>   | 0.79 ± 0.10 <sup>abcd</sup>   | 0.52 ± 0.05 <sup>ab</sup> |
| AY30      | n.d.        | 0.83 ± 0.14 <sup>a</sup>    | 15.52 ± 1.22 <sup>fghi</sup> | n.d.                       | 5.25 ± 0.49 <sup>i</sup>      | n.d.                      |
| AY31      | n.d.        | n.d.                        | 10.01 ± 1.36 <sup>de</sup>   | 0.49 ± 0.09 <sup>a</sup>   | 2.91 ± 0.10 <sup>gh</sup>     | n.d.                      |
| BZH       | n.d.        | 0.75 ± 0.03 <sup>a</sup>    | 19.90 ± 1.53 <sup>jk</sup>   | 4.77 ± 0.71 <sup>a</sup>   | 2.91 ± 0.04 <sup>gh</sup>     | n.d.                      |
| CR        | n.d.        | 0.39 ± 0.04 <sup>a</sup>    | 13.00 ± 0.65 <sup>efg</sup>  | 1.33 ± 0.16 <sup>a</sup>   | 1.50 ± 0.13 <sup>abcdef</sup> | 0.57 ± 0.07 <sup>ab</sup> |
| CX        | n.d.        | n.d.                        | 17.81 ± 0.82 <sup>hij</sup>  | n.d.                       | 4.93 ± 0.45 <sup>i</sup>      | n.d.                      |
| DF        | n.d.        | 0.38 ± 0.05 <sup>a</sup>    | 16.44 ± 0.47 <sup>ghij</sup> | n.d.                       | 2.60 ± 0.14 <sup>fg</sup>     | n.d.                      |
| GAC       | n.d.        | 27.36 ± 2.18 <sup>ef</sup>  | 1.19 ± 0.11 <sup>a</sup>     | 38.2 ± 6.62 <sup>d</sup>   | 0.18 ± 0.02 <sup>a</sup>      | 0.18 ± 0.02 <sup>a</sup>  |
| GN        | n.d.        | 9.87 ± 1.14 <sup>b</sup>    | 25.23 ± 1.26 <sup>lm</sup>   | 2.46 ± 0.14 <sup>a</sup>   | 1.91 ± 0.28 <sup>bcdefg</sup> | n.d.                      |
| GOC       | n.d.        | 0.33 ± 0.05 <sup>a</sup>    | 14.30 ± 1.79 <sup>fgh</sup>  | 1.95 ± 0.17 <sup>a</sup>   | 2.01 ± 0.39 <sup>cdefg</sup>  | 0.27 ± 0.03 <sup>a</sup>  |
| HMR       | n.d.        | 0.40 ± 0.02 <sup>a</sup>    | 14.53 ± 2.12 <sup>fgh</sup>  | n.d.                       | 4.19 ± 0.79 <sup>hi</sup>     | n.d.                      |
| HY        | 0.43 ± 0.02 | 21.70 ± 1.98 <sup>cd</sup>  | 0.70 ± 0.03 <sup>a</sup>     | 14.21 ± 0.64 <sup>b</sup>  | n.d.                          | 0.07 ± 0.01 <sup>a</sup>  |
| KZJ       | n.d.        | 1.32 ± 0.12 <sup>a</sup>    | 26.78 ± 1.01 <sup>m</sup>    | 1.77 ± 0.28 <sup>a</sup>   | 7.10 ± 1.08 <sup>j</sup>      | n.d.                      |
| MBWD      | n.d.        | 21.14 ± 1.75 <sup>c</sup>   | n.d.                         | n.d.                       | n.d.                          | n.d.                      |
| MTH       | n.d.        | 0.08 ± 0.01 <sup>a</sup>    | 5.65 ± 0.48 <sup>bc</sup>    | 0.23 ± 0.00 <sup>a</sup>   | 0.62 ± 0.09 <sup>ab</sup>     | n.d.                      |
| MXG       | n.d.        | 29.78 ± 3.39 <sup>f</sup>   | n.d.                         | n.d.                       | n.d.                          | n.d.                      |
| NG20      | n.d.        | n.d.                        | 16.36 ± 2.39 <sup>ghij</sup> | n.d.                       | 1.86 ± 0.22 <sup>bcdefg</sup> | n.d.                      |
| NH        | n.d.        | 1.07 ± 0.14 <sup>a</sup>    | 13.03 ± 0.39 <sup>efg</sup>  | 0.34 ± 0.04 <sup>a</sup>   | 2.23 ± 0.22 <sup>efg</sup>    | n.d.                      |
| OG        | n.d.        | 3.16 ± 0.33 <sup>a</sup>    | 3.66 ± 0.34 <sup>ab</sup>    | 52.88 ± 4.62 <sup>f</sup>  | n.d.                          | 3.65 ± 0.33 <sup>d</sup>  |
| PG        | n.d.        | 0.32 ± 0.05 <sup>a</sup>    | 6.44 ± 0.29 <sup>bcd</sup>   | 0.56 ± 0.07 <sup>a</sup>   | 0.92 ± 0.10 <sup>abcde</sup>  | n.d.                      |
| PTY       | n.d.        | 30.69 ± 3.66 <sup>f</sup>   | 0.89 ± 0.07 <sup>a</sup>     | 24.09 ± 0.90 <sup>c</sup>  | n.d.                          | 1.06 ± 0.11 <sup>b</sup>  |
| QJ        | n.d.        | 0.76 ± 0.06 <sup>a</sup>    | 11.95 ± 0.72 <sup>ef</sup>   | 0.82 ± 0.11 <sup>a</sup>   | 1.42 ± 0.25 <sup>abcdef</sup> | n.d.                      |
| QOG       | n.d.        | 3.78 ± 0.53 <sup>a</sup>    | 3.58 ± 0.10 <sup>ab</sup>    | 46.14 ± 1.76 <sup>ef</sup> | n.d.                          | 3.98 ± 0.45 <sup>d</sup>  |
| RN1       | n.d.        | 0.37 ± 0.01 <sup>a</sup>    | 16.81 ± 1.19 <sup>ghij</sup> | n.d.                       | 1.66 ± 0.18 <sup>bcdefg</sup> | n.d.                      |
| SJY       | n.d.        | 23.64 ± 3.71 <sup>cde</sup> | n.d.                         | n.d.                       | n.d.                          | n.d.                      |

|      |      |                             |                              |                            |                               |                           |
|------|------|-----------------------------|------------------------------|----------------------------|-------------------------------|---------------------------|
| SW   | n.d. | n.d.                        | 16.95 ± 2.91 <sup>ghij</sup> | n.d.                       | 2.19 ± 0.29 <sup>efg</sup>    | n.d.                      |
| SYXX | n.d. | n.d.                        | 18.97 ± 3.14 <sup>ijk</sup>  | 0.43 ± 0.03 <sup>a</sup>   | 2.62 ± 0.27 <sup>fg</sup>     | n.d.                      |
| TC   | n.d. | 0.04 ± 0.01 <sup>a</sup>    | 1.20 ± 0.09 <sup>a</sup>     | 0.14 ± 0.03 <sup>a</sup>   | 17.88 ± 1.35 <sup>k</sup>     | n.d.                      |
| TCH  | n.d. | 0.34 ± 0.02 <sup>a</sup>    | 22.24 ± 0.77 <sup>kl</sup>   | n.d.                       | 1.14 ± 0.11 <sup>abcde</sup>  | 0.49 ± 0.02 <sup>ab</sup> |
| WHOG | n.d. | 2.31 ± 0.14 <sup>a</sup>    | 2.36 ± 0.10 <sup>ab</sup>    | 45.05 ± 5.60 <sup>de</sup> | n.d.                          | 2.90 ± 0.38 <sup>c</sup>  |
| WZ   | n.d. | 0.17 ± 0.02 <sup>a</sup>    | 13.40 ± 1.43 <sup>efg</sup>  | n.d.                       | 1.79 ± 0.22 <sup>bcdefg</sup> | n.d.                      |
| YHY  | n.d. | 26.51 ± 3.24 <sup>def</sup> | n.d.                         | n.d.                       | n.d.                          | n.d.                      |
| YL   | n.d. | 0.74 ± 0.06 <sup>a</sup>    | 19.97 ± 1.52 <sup>jk</sup>   | n.d.                       | 2.11 ± 0.21 <sup>defg</sup>   | n.d.                      |
| YXC  | n.d. | 0.42 ± 0.07 <sup>a</sup>    | 9.30 ± 0.45 <sup>cde</sup>   | 0.20 ± 0.02 <sup>a</sup>   | 0.72 ± 0.10 <sup>abc</sup>    | 0.25 ± 0.04 <sup>a</sup>  |
| ZXY  | n.d. | 22.19 ± 2.47 <sup>cd</sup>  | n.d.                         | n.d.                       | n.d.                          | n.d.                      |

67 n.d. —not detected. Results were the mean ± SD (n = 3) on a dried weight (g) of citrus basis. Values within each column followed by different letters were significantly  
68 different  $p < 0.05$  according to Tukey's tests.

69

**Table S4.** The flavone and flavanone contents (mg/g DW) in the segment membrane of the 35 citrus cultivars.

| Cultivars | Vicenin-2   | Eriocitrin                 | Apigenin-8-C-glucoside    | Neoericitrin               | Diosmetin-6-C-glucoside  | Narirutin                    |
|-----------|-------------|----------------------------|---------------------------|----------------------------|--------------------------|------------------------------|
| AY27      | n.d.        | n.d.                       | n.d.                      | n.d.                       | n.d.                     | 1.60 ± 0.21 <sup>ab</sup>    |
| AY30      | n.d.        | n.d.                       | 1.95 ± 0.05 <sup>a</sup>  | n.d.                       | n.d.                     | 5.89 ± 0.38 <sup>defgh</sup> |
| AY31      | n.d.        | n.d.                       | n.d.                      | n.d.                       | n.d.                     | 5.03 ± 0.36 <sup>cdef</sup>  |
| BZH       | n.d.        | 3.08 ± 0.30 <sup>gh</sup>  | n.d.                      | 0.94 ± 0.13 <sup>bcd</sup> | 4.62 ± 0.16 <sup>a</sup> | 11.74 ± 1.93 <sup>ijkl</sup> |
| CR        | n.d.        | 0.93 ± 0.07 <sup>bc</sup>  | n.d.                      | n.d.                       | n.d.                     | 7.17 ± 1.09 <sup>efghi</sup> |
| CX        | n.d.        | 0.14 ± 0.02 <sup>ab</sup>  | n.d.                      | n.d.                       | n.d.                     | 3.88 ± 0.37 <sup>bcde</sup>  |
| DF        | n.d.        | 0.48 ± 0.04 <sup>ab</sup>  | n.d.                      | 0.61 ± 0.04 <sup>abc</sup> | n.d.                     | 9.62 ± 0.58 <sup>ijk</sup>   |
| GAC       | n.d.        | 2.39 ± 0.30 <sup>efg</sup> | n.d.                      | 4.98 ± 0.36 <sup>g</sup>   | n.d.                     | 1.53 ± 0.08 <sup>ab</sup>    |
| GN        | n.d.        | 9.36 ± 0.83 <sup>j</sup>   | 14.71 ± 1.99 <sup>b</sup> | 7.62 ± 0.76 <sup>h</sup>   | n.d.                     | 12.38 ± 1.11 <sup>kl</sup>   |
| GOC       | n.d.        | 1.62 ± 0.14 <sup>cde</sup> | n.d.                      | 0.65 ± 0.03 <sup>abc</sup> | n.d.                     | 8.43 ± 0.61 <sup>ghij</sup>  |
| HMR       | n.d.        | 2.15 ± 0.29 <sup>def</sup> | n.d.                      | n.d.                       | n.d.                     | 14.32 ± 1.93 <sup>l</sup>    |
| HY        | n.d.        | 1.45 ± 0.25 <sup>cd</sup>  | n.d.                      | 2.22 ± 0.40 <sup>f</sup>   | n.d.                     | 3.18 ± 0.20 <sup>abcd</sup>  |
| KZJ       | 6.51 ± 0.39 | 3.22 ± 0.09 <sup>ghi</sup> | 2.09 ± 0.36 <sup>a</sup>  | n.d.                       | n.d.                     | 9.44 ± 0.63 <sup>ijk</sup>   |
| MBWD      | n.d.        | n.d.                       | n.d.                      | n.d.                       | n.d.                     | n.d.                         |
| MTH       | n.d.        | n.d.                       | 1.79 ± 0.15 <sup>a</sup>  | n.d.                       | n.d.                     | 3.94 ± 0.20 <sup>bcde</sup>  |
| MXG       | n.d.        | n.d.                       | n.d.                      | n.d.                       | n.d.                     | 2.84 ± 0.38 <sup>abcd</sup>  |



|      |      |                            |                          |                            |                          |                              |
|------|------|----------------------------|--------------------------|----------------------------|--------------------------|------------------------------|
| NG20 | n.d. | 3.90 ± 0.36 <sup>hi</sup>  | n.d.                     | 1.63 ± 0.14 <sup>def</sup> | 4.24 ± 0.60 <sup>a</sup> | 10.27 ± 1.19 <sup>ijk</sup>  |
| NH   | n.d. | n.d.                       | n.d.                     | n.d.                       | n.d.                     | 7.73 ± 1.05 <sup>fghi</sup>  |
| OG   | n.d. | n.d.                       | n.d.                     | 0.13 ± 0.02 <sup>ab</sup>  | n.d.                     | 1.07 ± 0.21 <sup>ab</sup>    |
| PG   | n.d. | n.d.                       | 0.42 ± 0.06 <sup>a</sup> | n.d.                       | n.d.                     | 1.91 ± 0.22 <sup>abc</sup>   |
| PTY  | n.d. | 0.84 ± 0.13 <sup>abc</sup> | n.d.                     | 1.37 ± 0.16 <sup>cde</sup> | n.d.                     | 1.82 ± 0.23 <sup>abc</sup>   |
| QJ   | n.d. | 2.83 ± 0.40 <sup>fg</sup>  | n.d.                     | 1.76 ± 0.24 <sup>ef</sup>  | n.d.                     | 8.97 ± 0.75 <sup>hij</sup>   |
| QOG  | n.d. | n.d.                       | n.d.                     | 0.01 ± 0.00 <sup>a</sup>   | n.d.                     | 0.13 ± 0.02 <sup>a</sup>     |
| RN1  | n.d. | 2.41 ± 0.33 <sup>efg</sup> | n.d.                     | 0.57 ± 0.06 <sup>abc</sup> | n.d.                     | 7.98 ± 0.95 <sup>fghi</sup>  |
| SJY  | n.d. | n.d.                       | n.d.                     | n.d.                       | n.d.                     | n.d.                         |
| SW   | n.d. | n.d.                       | n.d.                     | n.d.                       | n.d.                     | 11.81 ± 1.40 <sup>ijkl</sup> |
| SYXX | n.d. | n.d.                       | n.d.                     | n.d.                       | n.d.                     | 13.98 ± 0.98 <sup>l</sup>    |
| TC   | n.d. | 0.09 ± 0.00 <sup>ab</sup>  | n.d.                     | n.d.                       | n.d.                     | 23.21 ± 3.42 <sup>m</sup>    |
| TCH  | n.d. | n.d.                       | n.d.                     | n.d.                       | n.d.                     | 5.49 ± 0.52 <sup>defg</sup>  |
| WHOG | n.d. | 0.01 ± 0.00 <sup>a</sup>   | n.d.                     | 0.02 ± 0.00 <sup>a</sup>   | n.d.                     | 0.10 ± 0.01 <sup>a</sup>     |
| WZ   | n.d. | 0.51 ± 0.06 <sup>ab</sup>  | n.d.                     | n.d.                       | n.d.                     | 9.60 ± 0.55 <sup>ijk</sup>   |
| YHY  | n.d. | n.d.                       | n.d.                     | n.d.                       | n.d.                     | n.d.                         |
| YL   | n.d. | 4.03 ± 0.30 <sup>i</sup>   | n.d.                     | 1.26 ± 0.18 <sup>cde</sup> | n.d.                     | 15.08 ± 1.87 <sup>l</sup>    |
| YXC  | n.d. | 0.42 ± 0.01 <sup>ab</sup>  | n.d.                     | n.d.                       | n.d.                     | 1.81 ± 0.07 <sup>abc</sup>   |
| ZXY  | n.d. | n.d.                       | n.d.                     | n.d.                       | n.d.                     | n.d.                         |

70

| Cultivars | Rhoifolin | Naringin                    | Hesperidin                    | Neohesperidin               | Didymin                      | Poncirin                  |
|-----------|-----------|-----------------------------|-------------------------------|-----------------------------|------------------------------|---------------------------|
| AY27      | n.d.      | 2.59 ± 0.29 <sup>a</sup>    | 9.30 ± 1.51 <sup>cdef</sup>   | 0.33 ± 0.04 <sup>ab</sup>   | 0.55 ± 0.05 <sup>a</sup>     | 0.44 ± 0.06 <sup>a</sup>  |
| AY30      | n.d.      | 2.15 ± 0.26 <sup>a</sup>    | 12.46 ± 0.63 <sup>defgh</sup> | n.d.                        | 4.33 ± 0.31 <sup>ij</sup>    | n.d.                      |
| AY31      | n.d.      | n.d.                        | 10.32 ± 0.54 <sup>cdefg</sup> | 0.42 ± 0.02 <sup>ab</sup>   | 3.11 ± 0.33 <sup>efghi</sup> | n.d.                      |
| BZH       | n.d.      | 1.40 ± 0.18 <sup>a</sup>    | 12.73 ± 2.05 <sup>defgh</sup> | 2.53 ± 0.39 <sup>cd</sup>   | 2.85 ± 0.34 <sup>efg</sup>   | n.d.                      |
| CR        | n.d.      | 1.39 ± 0.13 <sup>a</sup>    | 16.48 ± 0.69 <sup>hi</sup>    | 1.43 ± 0.10 <sup>abcd</sup> | 4.11 ± 0.33 <sup>hij</sup>   | 0.65 ± 0.10 <sup>ab</sup> |
| CX        | n.d.      | n.d.                        | 9.41 ± 1.58 <sup>cdef</sup>   | n.d.                        | 3.89 ± 0.20 <sup>fghij</sup> | n.d.                      |
| DF        | n.d.      | 0.99 ± 0.05 <sup>a</sup>    | 12.62 ± 1.71 <sup>defgh</sup> | n.d.                        | 2.07 ± 0.15 <sup>bcde</sup>  | n.d.                      |
| GAC       | n.d.      | 19.72 ± 1.32 <sup>def</sup> | 0.91 ± 0.10 <sup>a</sup>      | 20.52 ± 1.47 <sup>f</sup>   | n.d.                         | 0.12 ± 0.02 <sup>b</sup>  |
| GN        | n.d.      | 15.75 ± 1.37 <sup>cd</sup>  | 15.54 ± 2.69 <sup>hi</sup>    | 1.53 ± 0.10 <sup>abcd</sup> | 2.27 ± 0.37 <sup>cde</sup>   | n.d.                      |
| GOC       | n.d.      | 1.07 ± 0.09 <sup>a</sup>    | 13.28 ± 1.08 <sup>efgh</sup>  | 1.73 ± 0.11 <sup>abcd</sup> | 4.72 ± 0.66 <sup>jk</sup>    | 0.24 ± 0.04 <sup>ab</sup> |
| HMR       | n.d.      | 1.66 ± 0.09 <sup>a</sup>    | 18.67 ± 3.24 <sup>i</sup>     | n.d.                        | 2.22 ± 0.17 <sup>bcde</sup>  | n.d.                      |

|      |             |                            |                               |                             |                             |                           |
|------|-------------|----------------------------|-------------------------------|-----------------------------|-----------------------------|---------------------------|
| HY   | 0.31 ± 0.06 | 17.69 ± 3.22 <sup>de</sup> | 0.65 ± 0.06 <sup>a</sup>      | 8.68 ± 0.89 <sup>e</sup>    | n.d.                        | 0.05 ± 0.00 <sup>ab</sup> |
| KZJ  | n.d.        | 2.60 ± 0.26 <sup>a</sup>   | 15.94 ± 0.94 <sup>hi</sup>    | 0.98 ± 0.11 <sup>abcd</sup> | 4.83 ± 0.81 <sup>jk</sup>   | n.d.                      |
| MBWD | n.d.        | 22.81 ± 1.51 <sup>fg</sup> | n.d.                          | n.d.                        | n.d.                        | n.d.                      |
| MTH  | n.d.        | 0.61 ± 0.04 <sup>a</sup>   | 14.23 ± 2.11 <sup>ghi</sup>   | 0.63 ± 0.07 <sup>abc</sup>  | 1.54 ± 0.21 <sup>abcd</sup> | n.d.                      |
| MXG  | n.d.        | 9.17 ± 1.26 <sup>b</sup>   | n.d.                          | n.d.                        | n.d.                        | n.d.                      |
| NG20 | n.d.        | n.d.                       | 16.63 ± 2.50 <sup>hi</sup>    | n.d.                        | 2.43 ± 0.18 <sup>de</sup>   | n.d.                      |
| NH   | n.d.        | 4.12 ± 0.33 <sup>a</sup>   | 15.74 ± 0.88 <sup>hi</sup>    | 0.38 ± 0.05 <sup>ab</sup>   | 4.04 ± 0.29 <sup>ghij</sup> | n.d.                      |
| OG   | n.d.        | 3.67 ± 0.53 <sup>a</sup>   | 2.99 ± 0.19 <sup>ab</sup>     | 28.1 ± 2.23 <sup>g</sup>    | n.d.                        | 3.32 ± 0.46 <sup>e</sup>  |
| PG   | n.d.        | 1.36 ± 0.16 <sup>a</sup>   | 8.29 ± 0.08 <sup>cd</sup>     | 0.65 ± 0.09 <sup>abc</sup>  | 1.01 ± 0.10 <sup>ab</sup>   | n.d.                      |
| PTY  | n.d.        | 12.49 ± 1.96 <sup>bc</sup> | 0.19 ± 0.01 <sup>a</sup>      | 6.96 ± 0.48 <sup>e</sup>    | n.d.                        | 0.54 ± 0.06 <sup>ab</sup> |
| QJ   | n.d.        | 3.22 ± 0.33 <sup>a</sup>   | 12.33 ± 1.07 <sup>defgh</sup> | 1.07 ± 0.12 <sup>abcd</sup> | 1.07 ± 0.17 <sup>abc</sup>  | n.d.                      |
| QOG  | n.d.        | 3.13 ± 0.10 <sup>a</sup>   | 0.33 ± 0.02 <sup>a</sup>      | 2.72 ± 0.18 <sup>d</sup>    | n.d.                        | 2.59 ± 0.38 <sup>d</sup>  |
| RN1  | n.d.        | 1.19 ± 0.15 <sup>a</sup>   | 16.41 ± 1.82 <sup>hi</sup>    | n.d.                        | 2.02 ± 0.26 <sup>bcde</sup> | n.d.                      |
| SJY  | n.d.        | 21.9 ± 3.90 <sup>ef</sup>  | n.d.                          | n.d.                        | n.d.                        | n.d.                      |
| SW   | n.d.        | n.d.                       | 13.54 ± 0.92 <sup>fgh</sup>   | n.d.                        | 2.24 ± 0.13 <sup>cde</sup>  | n.d.                      |
| SYXX | n.d.        | n.d.                       | 18.51 ± 1.94 <sup>i</sup>     | 0.33 ± 0.02 <sup>ab</sup>   | 3.04 ± 0.54 <sup>efgh</sup> | n.d.                      |
| TC   | n.d.        | 0.08 ± 0.01 <sup>a</sup>   | 0.70 ± 0.08 <sup>a</sup>      | 0.08 ± 0.01 <sup>a</sup>    | 6.42 ± 0.59 <sup>l</sup>    | n.d.                      |
| TCH  | n.d.        | 0.33 ± 0.06 <sup>a</sup>   | 6.45 ± 0.77 <sup>bc</sup>     | n.d.                        | 0.69 ± 0.07 <sup>a</sup>    | 0.13 ± 0.00 <sup>ab</sup> |
| WHOG | n.d.        | 2.50 ± 0.08 <sup>a</sup>   | 0.16 ± 0.02 <sup>a</sup>      | 2.14 ± 0.39 <sup>bcd</sup>  | n.d.                        | 1.90 ± 0.18 <sup>c</sup>  |
| WZ   | n.d.        | 0.45 ± 0.03 <sup>a</sup>   | 9.01 ± 1.15 <sup>cde</sup>    | n.d.                        | 5.84 ± 0.9 <sup>kl</sup>    | n.d.                      |
| YHY  | n.d.        | 26.69 ± 3.40 <sup>g</sup>  | n.d.                          | n.d.                        | n.d.                        | n.d.                      |
| YL   | n.d.        | 2.12 ± 0.09 <sup>a</sup>   | 18.07 ± 1.58 <sup>i</sup>     | n.d.                        | 2.71 ± 0.36 <sup>def</sup>  | n.d.                      |
| YXC  | n.d.        | 1.21 ± 0.09 <sup>a</sup>   | 9.62 ± 1.11 <sup>cdef</sup>   | 0.20 ± 0.03 <sup>ab</sup>   | 0.54 ± 0.04 <sup>a</sup>    | 0.27 ± 0.03 <sup>ab</sup> |
| ZXY  | n.d.        | 23.46 ± 2.74 <sup>fg</sup> | n.d.                          | n.d.                        | n.d.                        | n.d.                      |

n.d. —not detected. Results were the mean ± SD (n = 3) on a dried weight (g) of citrus basis. Values within each column followed by different letters were significantly different  $p < 0.05$  according to Tukey's tests.

71  
72

73

**Table S5.** The flavone and flavanone contents (mg/g DW) in the juice sacs of the 35 citrus cultivars.

| Cultivars | Vicenin-2 | Eriocitrin | Apigenin-8-C-glucoside    | Neoericitrin | Diosmetin-6-C-glucoside | Narirutin                      |
|-----------|-----------|------------|---------------------------|--------------|-------------------------|--------------------------------|
| AY27      | n.d.      | n.d.       | n.d.                      | n.d.         | n.d.                    | 0.45 ± 0.02 <sup>ab</sup>      |
| AY30      | n.d.      | n.d.       | 0.77 ± 0.13 <sup>ab</sup> | n.d.         | n.d.                    | 1.10 ± 0.07 <sup>abcdefg</sup> |

|      |             |                             |                           |      |                            |                          |                                |
|------|-------------|-----------------------------|---------------------------|------|----------------------------|--------------------------|--------------------------------|
| AY31 | n.d.        | n.d.                        | n.d.                      | n.d. | n.d.                       | n.d.                     | 1.45 ± 0.12 <sup>bcdefgh</sup> |
| BZH  | n.d.        | 0.49 ± 0.04 <sup>de</sup>   | n.d.                      | n.d. | 0.16 ± 0.01 <sup>a</sup>   | 0.63 ± 0.06 <sup>a</sup> | 1.93 ± 0.34 <sup>fgh</sup>     |
| CR   | n.d.        | 0.28 ± 0.01 <sup>abcd</sup> | n.d.                      | n.d. | n.d.                       | n.d.                     | 1.55 ± 0.06 <sup>cdefgh</sup>  |
| CX   | n.d.        | 0.02 ± 0.00 <sup>a</sup>    | n.d.                      | n.d. | n.d.                       | n.d.                     | 0.64 ± 0.06 <sup>abcd</sup>    |
| DF   | n.d.        | 0.18 ± 0.02 <sup>abc</sup>  | n.d.                      | n.d. | 0.21 ± 0.01 <sup>ab</sup>  | n.d.                     | 2.09 ± 0.13 <sup>gh</sup>      |
| GAC  | n.d.        | 1.31 ± 0.14 <sup>g</sup>    | n.d.                      | n.d. | 0.89 ± 0.12 <sup>bcd</sup> | n.d.                     | 0.53 ± 0.08 <sup>abc</sup>     |
| GN   | n.d.        | 4.29 ± 0.24 <sup>i</sup>    | 5.16 ± 0.59 <sup>c</sup>  | n.d. | 3.44 ± 0.17 <sup>f</sup>   | n.d.                     | 2.23 ± 0.28 <sup>h</sup>       |
| GOC  | n.d.        | 0.45 ± 0.04 <sup>cde</sup>  | n.d.                      | n.d. | 0.17 ± 0.02 <sup>g</sup>   | n.d.                     | 1.88 ± 0.18 <sup>fgh</sup>     |
| HMR  | n.d.        | 1.64 ± 0.23 <sup>h</sup>    | n.d.                      | n.d. | n.d.                       | n.d.                     | 8.73 ± 0.76 <sup>j</sup>       |
| HY   | n.d.        | 0.36 ± 0.01 <sup>bcd</sup>  | n.d.                      | n.d. | 0.12 ± 0.01 <sup>abc</sup> | n.d.                     | 1.67 ± 0.23 <sup>defgh</sup>   |
| KZJ  | 3.34 ± 0.33 | 1.66 ± 0.05 <sup>h</sup>    | 1.11 ± 0.16 <sup>b</sup>  | n.d. | n.d.                       | n.d.                     | 3.94 ± 0.28 <sup>i</sup>       |
| MBWD | n.d.        | n.d.                        | n.d.                      | n.d. | n.d.                       | n.d.                     | n.d.                           |
| MTH  | n.d.        | n.d.                        | 0.78 ± 0.08 <sup>ab</sup> | n.d. | n.d.                       | n.d.                     | 0.77 ± 0.10 <sup>abcde</sup>   |
| MXG  | n.d.        | n.d.                        | n.d.                      | n.d. | n.d.                       | n.d.                     | 1.28 ± 0.15 <sup>bcdefgh</sup> |
| NG20 | n.d.        | 0.15 ± 0.01 <sup>ab</sup>   | n.d.                      | n.d. | 0.06 ± 0.01 <sup>ab</sup>  | 0.16 ± 0.01 <sup>b</sup> | 0.73 ± 0.09 <sup>abcde</sup>   |
| NH   | n.d.        | n.d.                        | n.d.                      | n.d. | n.d.                       | n.d.                     | 1.47 ± 0.13 <sup>bcdefgh</sup> |
| OG   | n.d.        | 0.40 ± 0.01 <sup>bcde</sup> | n.d.                      | n.d. | 0.05 ± 0.01 <sup>ab</sup>  | n.d.                     | 0.55 ± 0.06 <sup>abc</sup>     |
| PG   | n.d.        | n.d.                        | 0.32 ± 0.04 <sup>a</sup>  | n.d. | n.d.                       | n.d.                     | 8.44 ± 1.14 <sup>j</sup>       |
| PTY  | n.d.        | 0.91 ± 0.11 <sup>f</sup>    | n.d.                      | n.d. | 0.35 ± 0.04 <sup>ab</sup>  | n.d.                     | 1.77 ± 0.28 <sup>efgh</sup>    |
| QJ   | n.d.        | 0.66 ± 0.05 <sup>ef</sup>   | n.d.                      | n.d. | 0.40 ± 0.03 <sup>de</sup>  | n.d.                     | 0.74 ± 0.09 <sup>abcde</sup>   |
| QOG  | n.d.        | 0.26 ± 0.04 <sup>abcd</sup> | n.d.                      | n.d. | 0.01 ± 0.00 <sup>e</sup>   | n.d.                     | 0.41 ± 0.06 <sup>ab</sup>      |
| RN1  | n.d.        | 0.40 ± 0.06 <sup>bcde</sup> | n.d.                      | n.d. | 0.10 ± 0.01 <sup>ab</sup>  | n.d.                     | 0.98 ± 0.10 <sup>abcdef</sup>  |
| SJY  | n.d.        | n.d.                        | n.d.                      | n.d. | n.d.                       | n.d.                     | n.d.                           |
| SW   | n.d.        | n.d.                        | n.d.                      | n.d. | n.d.                       | n.d.                     | 1.74 ± 0.11 <sup>efgh</sup>    |
| SYXX | n.d.        | n.d.                        | n.d.                      | n.d. | n.d.                       | n.d.                     | 4.44 ± 0.14 <sup>i</sup>       |
| TC   | n.d.        | 0.16 ± 0.02 <sup>ab</sup>   | n.d.                      | n.d. | n.d.                       | n.d.                     | 4.83 ± 0.79 <sup>i</sup>       |
| TCH  | n.d.        | n.d.                        | n.d.                      | n.d. | n.d.                       | n.d.                     | 2.04 ± 0.21 <sup>fgh</sup>     |
| WHOG | n.d.        | 0.28 ± 0.04 <sup>abcd</sup> | n.d.                      | n.d. | 0.09 ± 0.00 <sup>ab</sup>  | n.d.                     | 0.08 ± 0.02 <sup>a</sup>       |
| WZ   | n.d.        | 0.17 ± 0.02 <sup>abc</sup>  | n.d.                      | n.d. | n.d.                       | n.d.                     | 1.37 ± 0.24 <sup>bcdefgh</sup> |
| YHY  | n.d.        | n.d.                        | n.d.                      | n.d. | n.d.                       | n.d.                     | n.d.                           |
| YL   | n.d.        | 0.87 ± 0.11 <sup>f</sup>    | n.d.                      | n.d. | 0.33 ± 0.02 <sup>cde</sup> | n.d.                     | 2.14 ± 0.12 <sup>gh</sup>      |
| YXC  | n.d.        | 0.21 ± 0.01 <sup>abcd</sup> | n.d.                      | n.d. | n.d.                       | n.d.                     | 0.62 ± 0.45 <sup>abcd</sup>    |

74

|           | ZXY         | n.d.                         | n.d.                        | n.d.                      | n.d.                         | n.d.                      | n.d. |
|-----------|-------------|------------------------------|-----------------------------|---------------------------|------------------------------|---------------------------|------|
| Cultivars | Rhoifolin   | Naringin                     | Hesperidin                  | Neohesperidin             | Didymin                      | Poncirin                  |      |
| AY27      | n.d.        | 1.33 ± 0.12 <sup>hi</sup>    | 8.02 ± 0.20 <sup>j</sup>    | 0.28 ± 0.05 <sup>a</sup>  | 0.18 ± 0.02 <sup>bcde</sup>  | 0.39 ± 0.07 <sup>d</sup>  |      |
| AY30      | n.d.        | 0.85 ± 0.09 <sup>efg</sup>   | 5.01 ± 0.74 <sup>fgh</sup>  | n.d.                      | 0.60 ± 0.06 <sup>j</sup>     | n.d.                      |      |
| AY31      | n.d.        | n.d.                         | 3.66 ± 0.24 <sup>defg</sup> | 0.15 ± 0.00 <sup>a</sup>  | 0.54 ± 0.03 <sup>ij</sup>    | n.d.                      |      |
| BZH       | n.d.        | 0.23 ± 0.02 <sup>abc</sup>   | 1.86 ± 0.25 <sup>abcd</sup> | 0.38 ± 0.04 <sup>a</sup>  | 0.30 ± 0.02 <sup>efg</sup>   | n.d.                      |      |
| CR        | n.d.        | 0.47 ± 0.07 <sup>abcde</sup> | 5.17 ± 0.96 <sup>fgh</sup>  | 0.51 ± 0.04 <sup>a</sup>  | 0.39 ± 0.07 <sup>ghi</sup>   | 0.23 ± 0.03 <sup>c</sup>  |      |
| CX        | n.d.        | n.d.                         | 0.98 ± 0.05 <sup>ab</sup>   | n.d.                      | 0.27 ± 0.01 <sup>defg</sup>  | n.d.                      |      |
| DF        | n.d.        | 0.36 ± 0.02 <sup>abcd</sup>  | 5.43 ± 0.42 <sup>gh</sup>   | n.d.                      | 0.31 ± 0.04 <sup>efg</sup>   | n.d.                      |      |
| GAC       | n.d.        | 2.77 ± 0.25 <sup>k</sup>     | n.d.                        | 3.68 ± 0.24 <sup>c</sup>  | n.d.                         | n.d.                      |      |
| GN        | n.d.        | 1.87 ± 0.02 <sup>j</sup>     | 4.47 ± 0.50 <sup>efgh</sup> | 0.52 ± 0.09 <sup>a</sup>  | 0.07 ± 0.01 <sup>ab</sup>    | n.d.                      |      |
| GOC       | n.d.        | 0.28 ± 0.02 <sup>abc</sup>   | 3.38 ± 0.26 <sup>def</sup>  | 0.39 ± 0.05 <sup>a</sup>  | 0.17 ± 0.02 <sup>abcde</sup> | 0.06 ± 0.01 <sup>ab</sup> |      |
| HMR       | n.d.        | 1.37 ± 0.22 <sup>hi</sup>    | 15.4 ± 1.97 <sup>k</sup>    | n.d.                      | 4.22 ± 0.07 <sup>n</sup>     | n.d.                      |      |
| HY        | 0.02 ± 0.00 | 2.42 ± 0.28 <sup>k</sup>     | 0.04 ± 0.00 <sup>a</sup>    | 0.92 ± 0.11 <sup>ab</sup> | n.d.                         | 0.01 ± 0.00 <sup>a</sup>  |      |
| KZJ       | n.d.        | 1.34 ± 0.06 <sup>hi</sup>    | 7.95 ± 0.24 <sup>j</sup>    | 0.45 ± 0.05 <sup>a</sup>  | 1.47 ± 0.12 <sup>m</sup>     | n.d.                      |      |
| MBWD      | n.d.        | 0.66 ± 0.10 <sup>cdef</sup>  | n.d.                        | n.d.                      | n.d.                         | n.d.                      |      |
| MTH       | n.d.        | 0.30 ± 0.00 <sup>abc</sup>   | 5.95 ± 0.64 <sup>hi</sup>   | 0.31 ± 0.01 <sup>a</sup>  | 0.37 ± 0.04 <sup>fgh</sup>   | n.d.                      |      |
| MXG       | n.d.        | 3.43 ± 0.44 <sup>l</sup>     | n.d.                        | n.d.                      | n.d.                         | n.d.                      |      |
| NG20      | n.d.        | n.d.                         | 0.62 ± 0.05 <sup>a</sup>    | n.d.                      | 0.51 ± 0.06 <sup>hij</sup>   | n.d.                      |      |
| NH        | n.d.        | 1.55 ± 0.24 <sup>ij</sup>    | 7.37 ± 0.97 <sup>ij</sup>   | 0.17 ± 0.02 <sup>a</sup>  | 0.40 ± 0.05 <sup>ghi</sup>   | n.d.                      |      |
| OG        | n.d.        | 0.76 ± 0.09 <sup>defg</sup>  | 1.42 ± 0.22 <sup>abc</sup>  | 11.64 ± 1.92 <sup>e</sup> | n.d.                         | 0.61 ± 0.06 <sup>e</sup>  |      |
| PG        | n.d.        | 1.17 ± 0.17 <sup>ghi</sup>   | 7.62 ± 1.09 <sup>ij</sup>   | 0.63 ± 0.06 <sup>a</sup>  | 0.78 ± 0.14 <sup>k</sup>     | n.d.                      |      |
| PTY       | n.d.        | 2.38 ± 0.23 <sup>k</sup>     | 0.13 ± 0.02 <sup>a</sup>    | 2.44 ± 0.22 <sup>bc</sup> | n.d.                         | 0.01 ± 0.00 <sup>a</sup>  |      |
| QJ        | n.d.        | 0.63 ± 0.08 <sup>bcdef</sup> | 2.77 ± 0.53 <sup>bcde</sup> | 0.24 ± 0.03 <sup>a</sup>  | 0.01 ± 0.00 <sup>a</sup>     | n.d.                      |      |
| QOG       | n.d.        | 0.63 ± 0.10 <sup>bcdef</sup> | 0.32 ± 0.02 <sup>a</sup>    | 7.40 ± 1.00 <sup>d</sup>  | n.d.                         | 0.49 ± 0.03 <sup>d</sup>  |      |
| RN1       | n.d.        | 0.19 ± 0.03 <sup>ab</sup>    | 2.86 ± 0.26 <sup>cde</sup>  | n.d.                      | 0.05 ± 0.01 <sup>ab</sup>    | n.d.                      |      |
| SJY       | n.d.        | 0.94 ± 0.06 <sup>fgh</sup>   | n.d.                        | n.d.                      | n.d.                         | n.d.                      |      |
| SW        | n.d.        | n.d.                         | 5.07 ± 0.34 <sup>fgh</sup>  | n.d.                      | 0.16 ± 0.01 <sup>abcde</sup> | n.d.                      |      |
| SYXX      | n.d.        | n.d.                         | 3.51 ± 0.33 <sup>def</sup>  | 0.07 ± 0.01 <sup>a</sup>  | 0.61 ± 0.07 <sup>j</sup>     | n.d.                      |      |
| TC        | n.d.        | 0.15 ± 0.01 <sup>a</sup>     | 1.30 ± 0.11 <sup>abc</sup>  | 0.14 ± 0.01 <sup>a</sup>  | 1.00 ± 0.01 <sup>l</sup>     | n.d.                      |      |
| TCH       | n.d.        | 0.14 ± 0.01 <sup>a</sup>     | 3.08 ± 0.43 <sup>cde</sup>  | n.d.                      | 0.10 ± 0.01 <sup>abc</sup>   | 0.05 ± 0.01 <sup>ab</sup> |      |

|      |      |                       |                      |                   |                       |                    |
|------|------|-----------------------|----------------------|-------------------|-----------------------|--------------------|
| WHOG | n.d. | $0.78 \pm 0.01$ defg  | $0.66 \pm 0.06$ a    | $7.64 \pm 0.45$ d | n.d.                  | $0.47 \pm 0.08$ d  |
| WZ   | n.d. | $0.13 \pm 0.01$ a     | $3.13 \pm 0.32$ cde  | n.d.              | $0.12 \pm 0.01$ abcd  | n.d.               |
| YHY  | n.d. | $0.78 \pm 0.03$ defg  | n.d.                 | n.d.              | n.d.                  | n.d.               |
| YL   | n.d. | $0.46 \pm 0.01$ abcde | $4.55 \pm 0.57$ efgh | n.d.              | $0.21 \pm 0.02$ bcdef | n.d.               |
| YXC  | n.d. | $0.81 \pm 0.03$ defg  | $5.44 \pm 0.23$ gh   | $0.18 \pm 0.01$ a | $0.26 \pm 0.01$ cdefg | $0.14 \pm 0.01$ bc |
| ZXY  | n.d. | $1.12 \pm 0.06$ ghi   | n.d.                 | n.d.              | n.d.                  | n.d.               |

n.d. —not detected. Results were the mean  $\pm$  SD (n = 3) on a dried weight (g) of citrus basis. Values within each column followed by different letters were significantly different  $p < 0.05$  according to Tukey's tests.

75

76

77

**Table S6.** Structure of flavonoid compounds identified in 35 citrus varieties

| Peak no.                      | Tentative Compounds     | Structure                                                                             | Remarks |
|-------------------------------|-------------------------|---------------------------------------------------------------------------------------|---------|
| <i>Flavone C-glycosides</i>   |                         |                                                                                       |         |
| 1                             | Vicenin-2               | 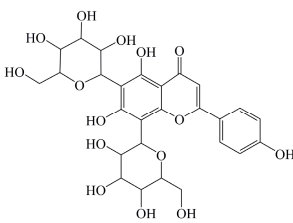   |         |
| 3                             | Apigenin-8-C-glucoside  |   |         |
| 5                             | Diosmetin-6-C-glucoside |  |         |
| <i>Flavanone O-glycosides</i> |                         |                                                                                       |         |

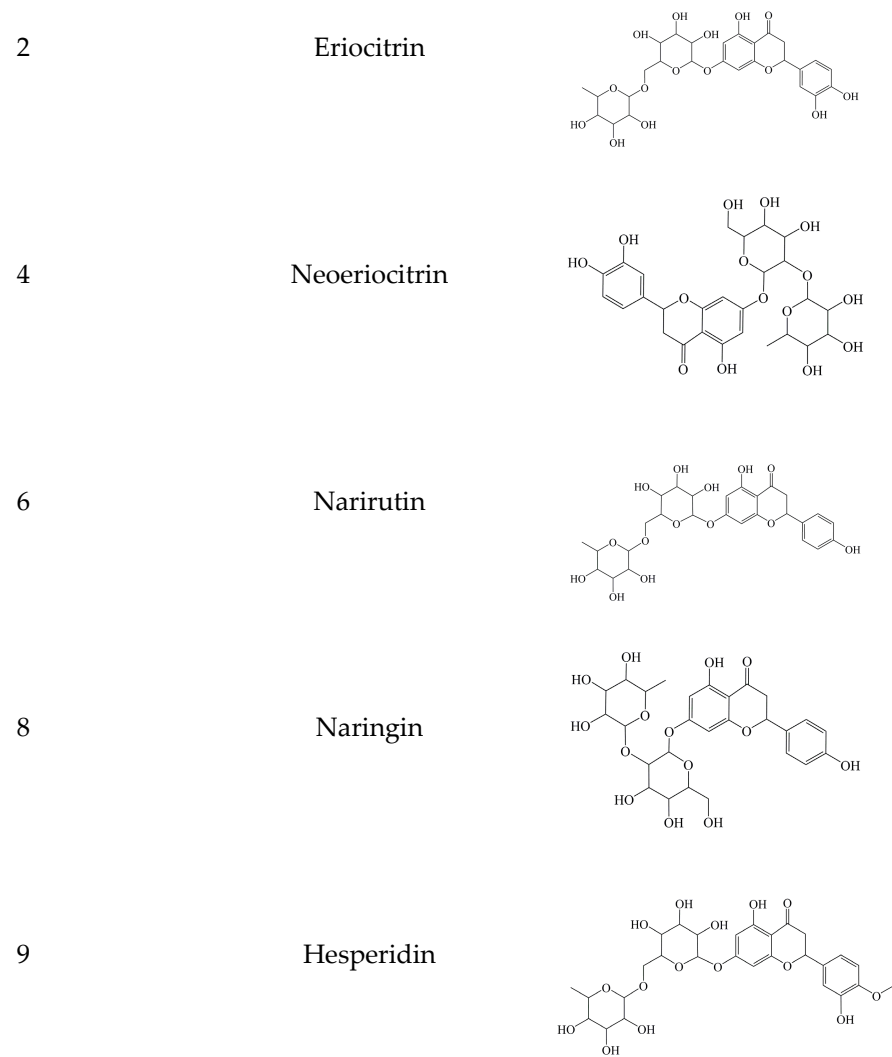

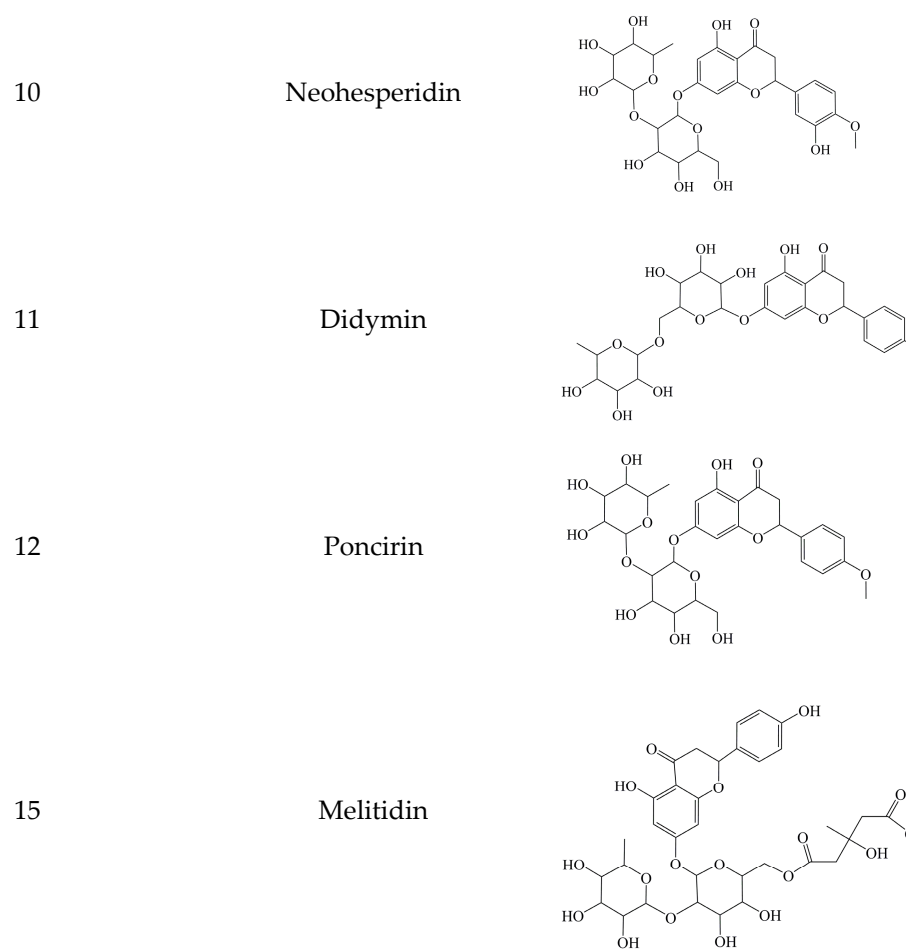

*Flavone O-glycoside*

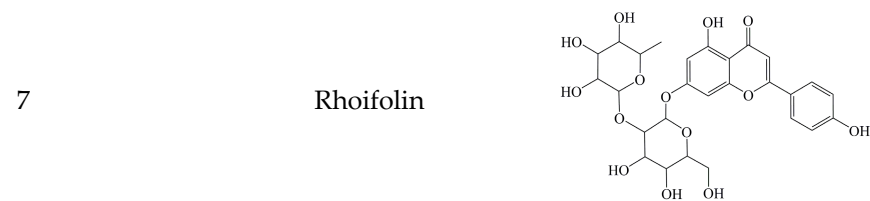*Polymethoxyflavonoids*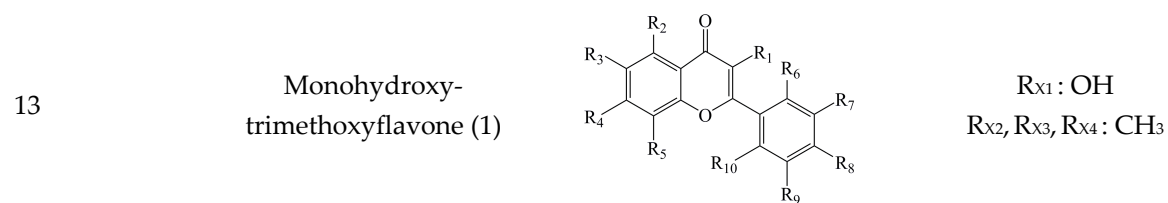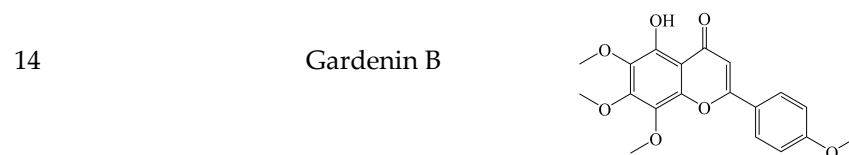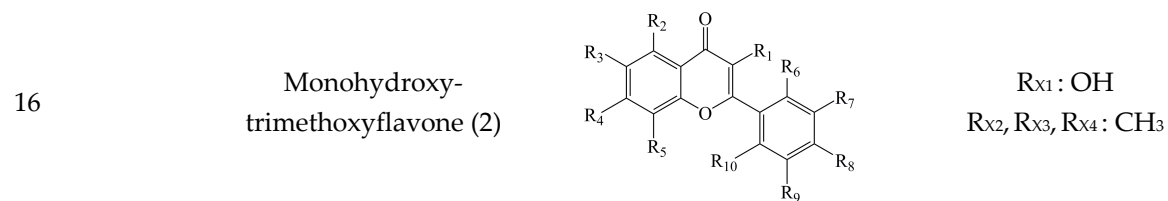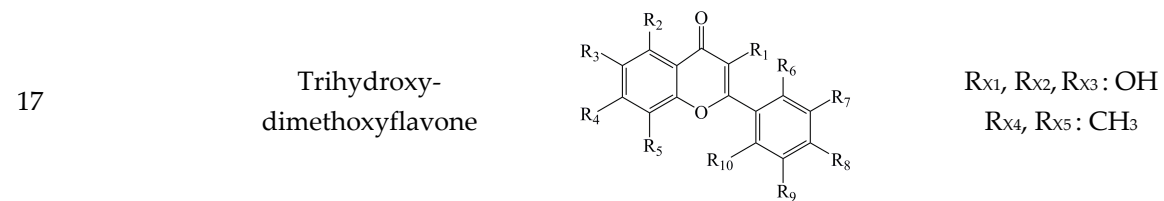



|    |                                     |                                                                                       |                                                                                                                                   |
|----|-------------------------------------|---------------------------------------------------------------------------------------|-----------------------------------------------------------------------------------------------------------------------------------|
| 18 | Monohydroxy-pentamethoxyflavone (1) | 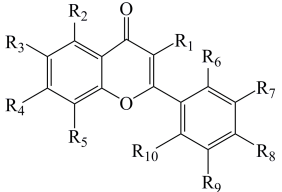   | R <sub>X1</sub> : OH<br>R <sub>X2</sub> , R <sub>X3</sub> , R <sub>X4</sub> , R <sub>X5</sub> , R <sub>X6</sub> : CH <sub>3</sub> |
| 19 | Isosinensetin                       |    |                                                                                                                                   |
| 20 | Monohydroxy-tetramethoxyflavone     |    | R <sub>X1</sub> : OH<br>R <sub>X2</sub> , R <sub>X3</sub> , R <sub>X4</sub> , R <sub>X5</sub> : CH <sub>3</sub>                   |
| 21 | Monohydroxy-pentamethoxyflavone (2) |   | R <sub>X1</sub> : OH<br>R <sub>X2</sub> , R <sub>X3</sub> , R <sub>X4</sub> , R <sub>X5</sub> , R <sub>X6</sub> : CH <sub>3</sub> |
| 22 | Hexamethoxyflavone (1)              |  | R <sub>X1</sub> , R <sub>X2</sub> , R <sub>X3</sub> , R <sub>X4</sub> , R <sub>X5</sub> , R <sub>X6</sub> :<br>CH <sub>3</sub>    |

|    |                                  |                                                                                       |                                                        |
|----|----------------------------------|---------------------------------------------------------------------------------------|--------------------------------------------------------|
| 23 | Sinensetin                       | 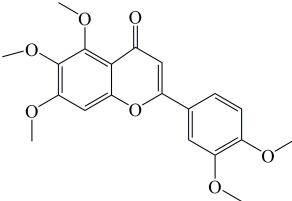   |                                                        |
| 24 | Tetramethyl-O-isoscutellarein    |    |                                                        |
| 25 | Dihydroxy-trimethoxyflavone      |    | $R_{X1}, R_{X2}: OH$<br>$R_{X3}, R_{X4}, R_{X5}: CH_3$ |
| 26 | Hexa-O-methylgossypetin          |   |                                                        |
| 27 | 5,7,3',4',5'-Pentamethoxyflavone |  |                                                        |

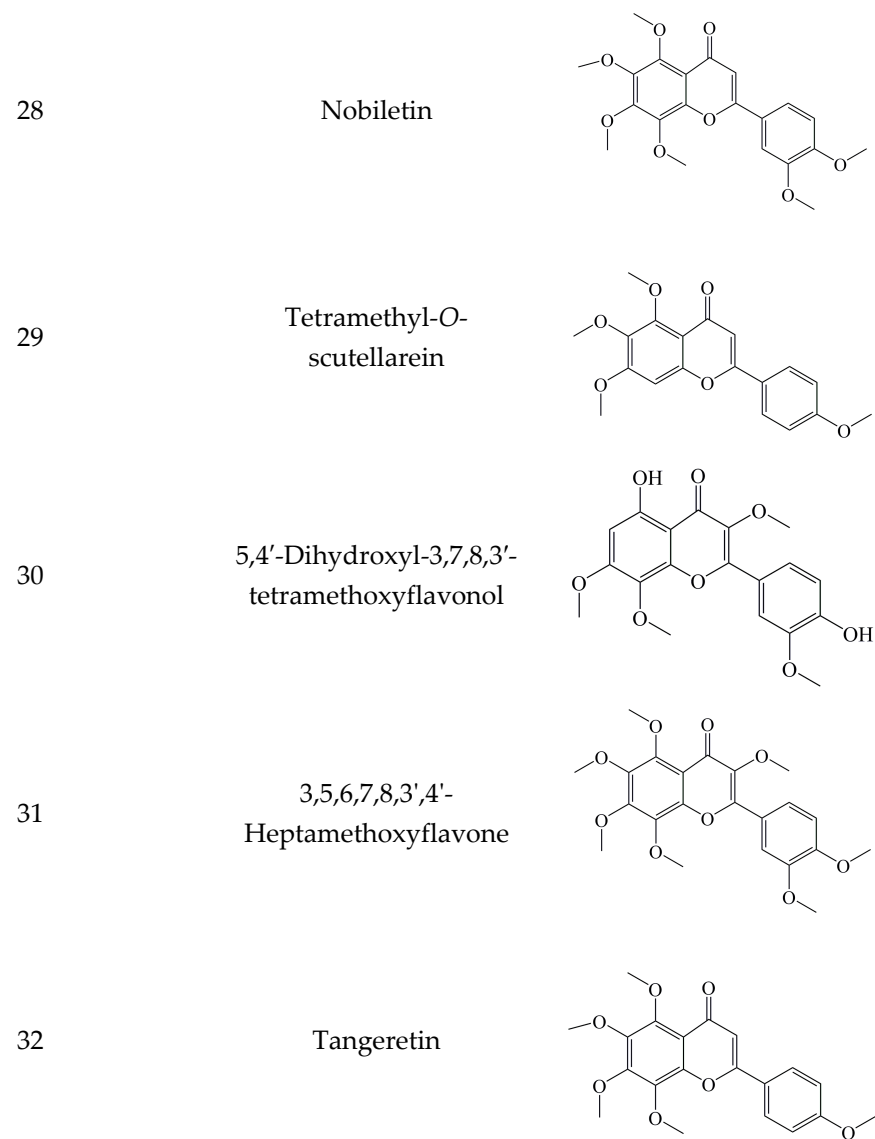

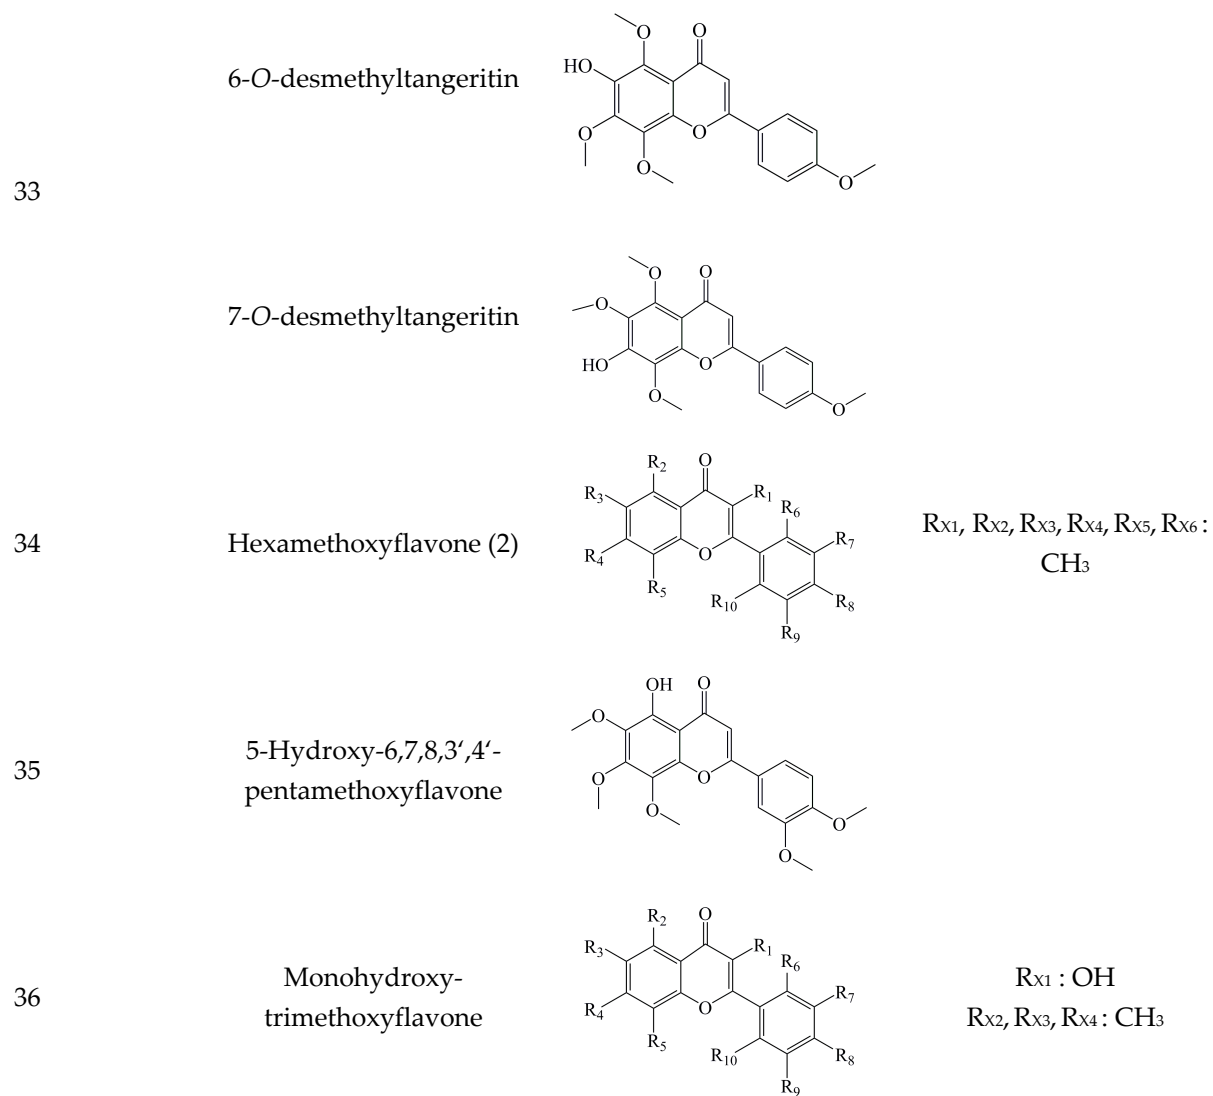

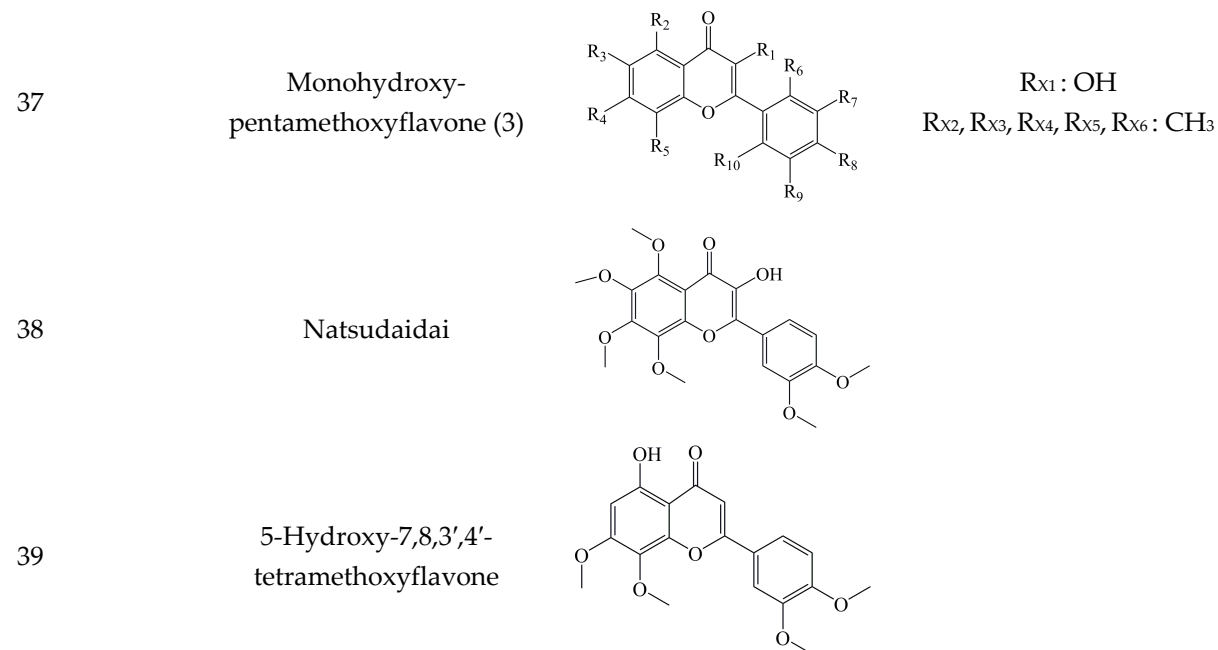

78

79

**Table S7.** Pearson's correlation coefficients among bioactive traits and individual flavonoid compounds in flavedo

| Flavonoids             | Total Phenolic | DPPH  | FRAP   | ORAC    | CUPRAC | APC Index | 1/IC <sub>50</sub> SGC-7901 | 1/IC <sub>50</sub> BGC-823 | 1/IC <sub>50</sub> AGS |
|------------------------|----------------|-------|--------|---------|--------|-----------|-----------------------------|----------------------------|------------------------|
| Vicenin-2              | 0.155          | 0.093 | 0.126  | 0.339 * | 0.141  | 0.188     | 0.086                       | 0.071                      | 0.092                  |
| Eriocitrin             | 0.150          | 0.306 | 0.031  | 0.122   | 0.151  | 0.170     | -0.049                      | -0.101                     | -0.082                 |
| Apigenin-8-C-glucoside | 0.227          | 0.122 | 0.119  | 0.145   | 0.205  | 0.161     | 0.280                       | 0.207                      | 0.183                  |
| Neeriocitrin           | 0.012          | 0.122 | -0.116 | 0.015   | 0.057  | 0.018     | 0.135                       | 0.019                      | 0.043                  |

|                                     |           |          |          |          |           |          |          |          |          |
|-------------------------------------|-----------|----------|----------|----------|-----------|----------|----------|----------|----------|
| Diosmetin-6-C-glucoside             | 0.091     | 0.155    | 0.082    | 0.062    | 0.072     | 0.106    | −0.041   | −0.035   | −0.044   |
| Narirutin                           | 0.451 **  | 0.449 ** | 0.310    | 0.490 ** | 0.484 **  | 0.477 ** | 0.320    | 0.230    | 0.354 *  |
| Rhoifolin                           | −0.442 ** | −0.310   | −0.320   | −0.290   | −0.497 ** | −0.396 * | −0.378 * | −0.366 * | −0.361 * |
| Naringin                            | −0.220    | 0.026    | −0.040   | −0.280   | −0.280    | −0.140   | 0.032    | −0.020   | −0.030   |
| Hesperidin                          | 0.546 **  | 0.320    | 0.388 *  | 0.349 *  | 0.558 **  | 0.467 ** | 0.320    | 0.373 *  | 0.371 *  |
| Neohesperidin                       | 0.053     | 0.030    | 0.066    | 0.094    | 0.086     | 0.075    | 0.241    | 0.153    | 0.172    |
| Didymin                             | 0.502 **  | 0.474 ** | 0.399 *  | 0.570 ** | 0.485 **  | 0.558 ** | 0.289    | 0.239    | 0.353 *  |
| Poncirin                            | 0.020     | −0.140   | −0.050   | 0.130    | 0.090     | 0.000    | 0.312    | 0.302    | 0.309    |
| Monohydroxy-trimethoxyflavone (1)   | 0.197     | 0.120    | 0.107    | 0.105    | 0.199     | 0.145    | 0.322    | 0.246    | 0.330    |
| Gardenin B                          | 0.462 **  | 0.445 ** | 0.498 ** | 0.280    | 0.452 **  | 0.477 ** | 0.481 ** | 0.476 ** | 0.529 ** |
| Melitidin                           | −0.140    | 0.004    | 0.016    | −0.377 * | −0.290    | −0.150   | −0.110   | −0.100   | −0.130   |
| Monohydroxy-trimethoxyflavone (2)   | 0.384 *   | 0.290    | 0.464 ** | 0.200    | 0.300     | 0.363 *  | 0.336 *  | 0.320    | 0.321    |
| Trihydroxy-dimethoxyflavone         | 0.301     | 0.352 *  | 0.331    | 0.117    | 0.320     | 0.321    | −0.120   | −0.130   | −0.080   |
| Monohydroxy-pentamethoxyflavone (1) | 0.609 **  | 0.419 *  | 0.332    | 0.534 ** | 0.476 **  | 0.524 ** | 0.362 *  | 0.310    | 0.362 *  |
| Isosinensetin                       | 0.435 **  | 0.210    | 0.381 *  | 0.320    | 0.457 **  | 0.380 *  | 0.580 ** | 0.522 ** | 0.533 ** |
| Monohydroxy-tetramethoxyflavone     | 0.094     | −0.030   | 0.007    | 0.197    | 0.162     | 0.080    | 0.351 *  | 0.335 *  | 0.415 *  |
| Monohydroxy-pentamethoxyflavone (2) | 0.160     | −0.010   | 0.094    | 0.267    | 0.215     | 0.145    | 0.341 *  | 0.309    | 0.343 *  |
| Hexamethoxyflavone (1)              | 0.170     | 0.201    | 0.139    | 0.056    | 0.260     | 0.183    | 0.405 *  | 0.419 *  | 0.459 ** |
| Sinensetin                          | 0.513 **  | 0.425 *  | 0.584 ** | 0.285    | 0.463 **  | 0.501 ** | 0.467 ** | 0.458 ** | 0.449 ** |

|                                                                   |          |          |          |          |          |          |          |          |          |
|-------------------------------------------------------------------|----------|----------|----------|----------|----------|----------|----------|----------|----------|
| Tetramethyl- <i>O</i> -isoscutellarein                            | 0.077    | -0.030   | 0.034    | 0.156    | 0.142    | 0.073    | 0.356 *  | 0.269    | 0.300    |
| Dihydroxy-trimethoxyflavone                                       | 0.576 ** | 0.473 ** | 0.322    | 0.484 ** | 0.476 ** | 0.482 ** | 0.310    | 0.260    | 0.310    |
| Hexa- <i>O</i> -methylgossypetin                                  | 0.192    | 0.247    | 0.179    | 0.062    | 0.283    | 0.217    | 0.451 ** | 0.529 ** | 0.494 ** |
| 5,7,3',4',5'-Pentamethoxyflavone                                  | -0.130   | -0.070   | 0.001    | -0.170   | -0.180   | -0.110   | 0.211    | 0.298    | 0.273    |
| Nobiletin                                                         | 0.378 *  | 0.200    | 0.373 *  | 0.300    | 0.400 *  | 0.354 *  | 0.587 ** | 0.530 ** | 0.534 ** |
| Tetramethyl- <i>O</i> -scutellarein                               | 0.256    | 0.220    | 0.372 *  | 0.075    | 0.212    | 0.257    | 0.483 ** | 0.537 ** | 0.507 ** |
| 5,4'-Dihydroxyl-3,7,8,3'-tetramethoxyflavonol                     | 0.470 ** | 0.333    | 0.515 ** | 0.457 ** | 0.438 ** | 0.490 ** | 0.386 *  | 0.349 *  | 0.375 *  |
| 3,5,6,7,8,3',4'-Heptamethoxyflavone                               | 0.280    | 0.226    | 0.184    | 0.090    | 0.371 *  | 0.240    | 0.362 *  | 0.397 *  | 0.395 *  |
| Tangeretin                                                        | 0.237    | 0.086    | 0.220    | 0.267    | 0.277    | 0.231    | 0.478 ** | 0.408 *  | 0.417 *  |
| 6- <i>O</i> -desmethyltangeritin/7- <i>O</i> -desmethyltangeritin | 0.526 ** | 0.487 ** | 0.520 ** | 0.220    | 0.494 ** | 0.493 ** | 0.495 ** | 0.362 *  | 0.450 ** |
| Hexamethoxyflavone (2)                                            | 0.120    | 0.171    | 0.030    | 0.006    | 0.163    | 0.103    | 0.223    | 0.138    | 0.152    |
| 5-Hydroxy-6,7,8,3',4'-pentamethoxyflavone                         | 0.335 *  | 0.180    | 0.344 *  | 0.310    | 0.339 *  | 0.320    | 0.454 ** | 0.391 *  | 0.413 *  |
| Monohydroxy-trimethoxyflavone                                     | 0.328    | 0.342 *  | 0.478 ** | 0.051    | 0.259    | 0.334    | 0.444 ** | 0.449 ** | 0.467 ** |
| Monohydroxy-pentamethoxyflavone (3)                               | 0.082    | 0.021    | 0.000    | 0.168    | 0.001    | 0.047    | -0.170   | -0.140   | -0.140   |

|                                         |       |        |        |       |       |       |        |        |        |
|-----------------------------------------|-------|--------|--------|-------|-------|-------|--------|--------|--------|
| Natsudaidai                             | 0.062 | 0.023  | 0.009  | 0.052 | 0.105 | 0.048 | -0.060 | -0.040 | -0.020 |
| 5-Hydroxy-7,8,3',4'-tetramethoxyflavone | 0.022 | -0.080 | -0.030 | 0.168 | 0.086 | 0.026 | 0.272  | 0.238  | 0.257  |

80

1/IC<sub>50</sub> means the reciprocal value of IC<sub>50</sub>; One and two asterisks represent statistical significance at  $p < 0.05$  and  $p < 0.01$ , respectively

81

**Table S8.** Pearson's correlation coefficients among bioactive traits and individual flavonoid compounds in albedo

| Flavonoids              | Total Phenolic | DPPH   | FRAP   | ORAC     | CUPRAC   | APC Index |
|-------------------------|----------------|--------|--------|----------|----------|-----------|
| Vicenin-2               | 0.028          | -0.066 | 0.053  | -0.046   | -0.033   | -0.032    |
| Eriocitrin              | 0.050          | -0.030 | -0.058 | 0.175    | 0.051    | 0.050     |
| Apigenin-8-C-glucoside  | 0.035          | -0.001 | -0.044 | 0.156    | 0.049    | 0.056     |
| Neeriocitrin            | 0.433 **       | 0.259  | 0.229  | 0.321    | 0.220    | 0.337 *   |
| Diosmetin-6-C-glucoside | -0.071         | 0.026  | 0.021  | -0.127   | 0.055    | -0.011    |
| Narirutin               | -0.157         | -0.140 | -0.186 | 0.517 ** | -0.089   | 0.048     |
| Rhoifolin               | 0.088          | 0.016  | -0.134 | 0.169    | 0.005    | 0.025     |
| Naringin                | 0.406 *        | 0.072  | -0.013 | 0.094    | -0.227   | -0.021    |
| Hesperidin              | -0.414 *       | -0.239 | -0.163 | -0.083   | -0.047   | -0.172    |
| Neohesperidin           | 0.683 **       | 0.280  | 0.301  | 0.432 ** | 0.718 ** | 0.565 **  |
| Didymin                 | -0.118         | -0.015 | -0.038 | 0.367 *  | -0.051   | 0.094     |
| Poncirin                | 0.407 *        | 0.056  | 0.085  | 0.309    | 0.618 ** | 0.351 *   |

82

One and two asterisks represent statistical significance at  $p < 0.05$  and  $p < 0.01$ , respectively

83

**Table S9.** Pearson's correlation coefficients among bioactive traits and individual flavonoid compounds in segment membrane



| Flavonoids              | Total Phenolic | DPPH   | FRAP   | ORAC     | CUPRAC   | APC Index |
|-------------------------|----------------|--------|--------|----------|----------|-----------|
| Vicenin-2               | -0.048         | -0.266 | -0.120 | -0.099   | -0.218   | -0.234    |
| Eriocitrin              | 0.303          | -0.130 | -0.035 | 0.230    | -0.087   | 0.014     |
| Apigenin-8-C-glucoside  | 0.075          | -0.123 | -0.104 | 0.110    | -0.167   | -0.082    |
| Neeriocitrin            | 0.450 **       | -0.049 | 0.113  | 0.344 *  | 0.097    | 0.195     |
| Diosmetin-6-C-glucoside | -0.004         | -0.028 | 0.017  | 0.065    | -0.053   | 0.006     |
| Narirutin               | 0.184          | 0.199  | 0.221  | 0.194    | 0.039    | 0.225     |
| Rhoifolin               | 0.140          | 0.017  | 0.051  | 0.195    | 0.324    | 0.211     |
| Naringin                | 0.370 *        | -0.094 | -0.077 | 0.592 ** | 0.468 ** | 0.346 *   |
| Hesperidin              | -0.066         | -0.002 | -0.014 | -0.223   | -0.243   | -0.178    |
| Neohesperidin           | 0.555 **       | 0.143  | 0.169  | 0.247    | 0.014    | 0.204     |
| Didymin                 | -0.093         | 0.070  | 0.075  | -0.037   | -0.147   | -0.019    |
| Poncirin                | 0.199          | 0.018  | -0.156 | 0.004    | -0.327   | -0.153    |

One and two asterisks represent statistical significance at  $p < 0.05$  and  $p < 0.01$ , respectively

84

85

**Table S10.** Pearson's correlation coefficients among bioactive traits and individual flavonoid compounds in juice sacs

| Flavonoids             | Total Phenolic | DPPH     | FRAP   | ORAC     | CUPRAC   | APC Index |
|------------------------|----------------|----------|--------|----------|----------|-----------|
| Vicenin-2              | 0.078          | -0.381 * | -0.203 | 0.433 ** | -0.338 * | -0.147    |
| Eriocitrin             | 0.061          | -0.114   | -0.128 | 0.105    | -0.041   | -0.057    |
| Apigenin-8-C-glucoside | 0.012          | -0.068   | -0.128 | -0.043   | -0.025   | -0.096    |
| Neeriocitrin           | 0.021          | 0.035    | -0.038 | -0.055   | 0.05     | -0.005    |

|                         |         |        |        |         |         |         |
|-------------------------|---------|--------|--------|---------|---------|---------|
| Diosmetin-6-C-glucoside | -0.044  | 0.119  | 0.129  | -0.248  | 0.317   | 0.091   |
| Narirutin               | 0.215   | -0.02  | 0.001  | 0.076   | 0.013   | 0.029   |
| Rhoifolin               | 0.155   | 0.286  | 0.192  | -0.132  | 0.412 * | 0.261   |
| Naringin                | 0.247   | 0.138  | 0.262  | 0.308   | 0.183   | 0.336 * |
| Hesperidin              | 0.188   | -0.142 | 0.007  | 0.182   | -0.098  | -0.009  |
| Neohesperidin           | 0.377 * | -0.055 | -0.11  | 0.309   | -0.097  | 0.042   |
| Didymin                 | 0.049   | -0.13  | -0.031 | 0.004   | -0.042  | -0.074  |
| Poncirin                | 0.383 * | -0.122 | -0.068 | 0.347 * | -0.093  | 0.047   |

One and two asterisks represent statistical significance at  $p < 0.05$  and  $p < 0.01$ , respectively

86

87

88
